# Supplementary material for: Maternal plasma proteome profiling of biomarkers and pathogenic mechanisms of early-onset and late-onset preeclampsia
Source: Research Square preprint supplement (doi:10.21203/rs.3.rs-1429136/v1), 2022-03-14
Supplement: Supplementary file 1 [file 9ba32e466eb9658865776234.xlsx]

## Sheet: Supplementary data 1
Protein	Healthy pregnancy	Healthy pregnancy	Healthy pregnancy	Healthy pregnancy	Healthy pregnancy	Healthy pregnancy	Healthy pregnancy	Healthy pregnancy	Healthy pregnancy	Healthy pregnancy	Healthy pregnancy	Healthy pregnancy	Healthy pregnancy	Healthy pregnancy	Healthy pregnancy	Healthy pregnancy	Healthy pregnancy	Healthy pregnancy	EOPE	EOPE	EOPE	EOPE	EOPE	EOPE	EOPE	EOPE	EOPE	EOPE	EOPE	EOPE	EOPE	EOPE	EOPE	EOPE	EOPE	LOPE	LOPE	LOPE	LOPE	LOPE	LOPE	LOPE	LOPE	LOPE	LOPE	LOPE
Transgelin-2	0	0	0	0	0	0	0	24300	222000	454000	0	0	50600	118000	14900	412000	0	0	0	0	0	0	0	0	0	0	0	0	0	0	0	0	0	0	0	0	0	0	0	0	0	831000	0	0	0	0
[Protein ADP-ribosylarginine] hydrolase-like protein 1	0	0	0	0	0	0	0	0	0	888000	0	0	0	0	0	0	0	0	0	4850000	0	0	0	0	0	0	792000	0	0	0	0	0	0	0	0	2000000	0	0	0	0	0	0	0	0	0	0
Fibronectin	147000000	380000000	304000000	328000000	181000000	500000000	421000000	227000000	994000000	126000000	296000000	517000000	439000000	353000000	328000000	239000000	348000000	250000000	1120000000	1630000000	702000000	996000000	1270000000	2090000000	268000000	355000000	1240000000	486000000	561000000	636000000	370000000	297000000	726000000	712000000	761000000	768000000	1190000000	992000000	3570000000	1100000000	706000000	953000000	661000000	291000000	516000000	704000000
Coagulation factor V	8990000	3460000	5570000	6230000	6640000	3610000	5220000	9170000	10100000	9530000	6020000	7520000	5340000	4690000	4350000	7010000	4770000	6400000	11600000	18500000	7710000	8990000	6770000	7430000	7340000	9160000	6560000	10700000	12400000	12900000	12300000	5570000	17500000	6610000	6670000	7870000	3290000	9250000	14200000	8210000	11700000	12700000	7990000	8310000	10200000	7030000
Complement C1r subcomponent	61500000	45100000	44500000	29900000	42200000	31900000	39900000	55800000	46600000	49600000	34700000	46800000	30900000	40800000	30800000	43800000	34800000	35800000	44300000	45300000	54100000	33100000	65700000	63200000	77200000	87500000	57700000	49700000	46400000	86500000	67600000	53000000	70300000	61500000	47900000	48100000	37100000	54500000	55800000	63300000	62500000	85000000	53200000	53700000	75700000	64500000
Alpha-2-macroglobulin	5040000000	1840000000	3030000000	3030000000	4500000000	3520000000	2110000000	4680000000	3320000000	3860000000	2830000000	2530000000	3730000000	2820000000	2010000000	2770000000	3110000000	2950000000	3000000000	7720000000	3790000000	4160000000	3130000000	5260000000	5600000000	4850000000	5180000000	4750000000	4800000000	6300000000	3410000000	3420000000	5120000000	4540000000	5040000000	3780000000	4090000000	6890000000	4330000000	3630000000	4560000000	6650000000	5420000000	2820000000	5970000000	3360000000
Inter-alpha-trypsin inhibitor heavy chain H3	59000000	43400000	21300000	22600000	40700000	54700000	40100000	68600000	104000000	65700000	52600000	45700000	49800000	77800000	79400000	48000000	45900000	51700000	24200000	179000000	41800000	88500000	78900000	99700000	93100000	125000000	174000000	113000000	105000000	375000000	125000000	34500000	142000000	55100000	137000000	103000000	72900000	67600000	106000000	71900000	71600000	82200000	54400000	43600000	87600000	86400000
Apolipoprotein B-100	3280000000	3030000000	3050000000	4120000000	5310000000	4360000000	4490000000	6300000000	5250000000	3390000000	5870000000	3080000000	4180000000	3970000000	3660000000	2730000000	2850000000	5680000000	4730000000	6100000000	6150000000	4590000000	4170000000	5100000000	5050000000	4040000000	8720000000	3870000000	4350000000	4610000000	7180000000	2240000000	4830000000	4140000000	5680000000	4630000000	4090000000	6180000000	5530000000	7290000000	7530000000	6510000000	6290000000	4700000000	4650000000	5590000000
Inhibin beta C chain	0	337000	246000	346000	164000	443000	258000	0	361000	0	477000	131000	394000	241000	222000	354000	176000	546000	606000	672000	417000	556000	496000	607000	0	655000	0	434000	442000	0	667000	151000	467000	373000	627000	285000	705000	984000	676000	0	0	322000	1050000	386000	449000	394000
Carboxypeptidase N catalytic chain	34600000	34100000	30400000	32400000	22300000	33100000	35200000	40700000	28300000	29200000	36100000	21500000	36400000	34400000	36700000	34800000	15400000	36400000	40500000	82600000	33900000	44700000	46000000	60900000	39100000	52000000	23700000	50600000	53800000	31500000	64300000	40500000	51600000	31900000	32300000	40000000	39800000	54300000	44400000	54300000	45300000	53500000	46200000	24300000	39500000	58900000
Histidine-rich glycoprotein	126000000	103000000	101000000	20900000	51200000	122000000	20500000	70400000	25900000	50100000	54400000	39200000	51000000	100000000	49700000	62500000	17200000	11600000	62400000	108000000	295000000	90000000	64300000	104000000	114000000	107000000	121000000	85700000	96200000	210000000	197000000	81100000	239000000	58400000	166000000	64100000	96500000	85800000	45300000	160000000	202000000	174000000	47200000	127000000	123000000	89900000
Complement factor D	2050000	830000	1250000	1560000	822000	675000	258000	1550000	1960000	924000	24000	578000	800000	1780000	305000	314000	798000	893000	3810000	1720000	1150000	2390000	2690000	1110000	5870000	3140000	1350000	1650000	1930000	1930000	3260000	987000	4320000	2080000	1740000	1330000	183000	1980000	6410000	4000000	1030000	5830000	1480000	2120000	4750000	1350000
Apolipoprotein E	661000000	444000000	474000000	742000000	464000000	443000000	504000000	755000000	754000000	765000000	672000000	520000000	698000000	652000000	712000000	295000000	337000000	1660000000	1100000000	980000000	918000000	567000000	466000000	808000000	726000000	1120000000	1150000000	988000000	1100000000	648000000	1310000000	269000000	1390000000	1040000000	682000000	847000000	491000000	952000000	1040000000	1100000000	1250000000	1090000000	1690000000	2460000000	1310000000	903000000
Complement C1s subcomponent	69500000	34700000	48600000	25700000	45200000	37100000	31000000	65400000	49500000	58800000	48500000	40100000	38600000	63900000	31500000	40600000	35300000	36800000	74800000	58100000	45800000	29900000	56000000	43700000	99700000	56000000	99700000	77900000	47900000	97100000	90200000	37900000	98600000	42200000	56500000	64500000	37900000	55600000	75400000	83500000	58600000	120000000	48800000	55100000	83900000	45900000
von Willebrand factor	11200000	14100000	4000000	5480000	6190000	19100000	4870000	13300000	23400000	8940000	14600000	24100000	10700000	6010000	5450000	6830000	7620000	2010000	14600000	24700000	9720000	25900000	19200000	21400000	8450000	5920000	54100000	13800000	11900000	16600000	18100000	8230000	9520000	13600000	13500000	11900000	16600000	29700000	60300000	35200000	14800000	57000000	14000000	4660000	15800000	7480000
Alpha-1-acid glycoprotein 1	659000000	1220000000	930000000	561000000	776000000	529000000	693000000	872000000	1050000000	744000000	661000000	846000000	784000000	883000000	964000000	1010000000	972000000	321000000	865000000	1010000000	599000000	919000000	1890000000	1120000000	915000000	1760000000	551000000	980000000	1130000000	1430000000	1460000000	693000000	653000000	1350000000	1060000000	857000000	727000000	1400000000	912000000	1130000000	1370000000	1870000000	1170000000	1070000000	1280000000	1010000000
Immunoglobulin lambda variable 3-21	25900000	38100000	21000000	17700000	30100000	23400000	21100000	25000000	42200000	26600000	21100000	15300000	22900000	29600000	15500000	11900000	11000000	34800000	23000000	10300000	29800000	38900000	11900000	9490000	40900000	4590000	11700000	8740000	5150000	16300000	15500000	18900000	11100000	10500000	13700000	12700000	2630000	22300000	13600000	5280000	29100000	21700000	10600000	10700000	38500000	4450000
Cystatin-C	1960000	1810000	642000	2560000	1780000	1620000	2470000	1230000	13500000	1240000	3250000	1890000	3280000	1240000	2080000	608000	826000	2200000	3450000	4710000	2320000	5580000	4310000	4570000	4110000	4470000	3780000	1220000	2430000	2050000	3420000	1710000	3170000	4240000	2860000	3500000	3050000	4920000	4920000	2760000	5050000	3210000	7120000	1430000	3490000	1800000
Serum amyloid P-component	120000000	99600000	102000000	92200000	71500000	90700000	76900000	147000000	66000000	115000000	90000000	97700000	92300000	168000000	109000000	66300000	88200000	122000000	231000000	137000000	123000000	61700000	136000000	114000000	145000000	91200000	152000000	294000000	110000000	108000000	205000000	53300000	315000000	114000000	121000000	59800000	136000000	79200000	295000000	265000000	131000000	217000000	145000000	254000000	206000000	91300000
Immunoglobulin lambda variable 7-46	694000	1530000	885000	1760000	1050000	0	0	1520000	0	166000	0	474000	3590000	215000	3070000	422000	0	541000	0	0	2140000	0	1730000	0	3520000	627000	0	3520000	3320000	0	6960000	802000	186000	0	4020000	0	2630000	0	2160000	12000000	2720000	3470000	0	2920000	3260000	1820000
Protein AMBP	51600000	28800000	60700000	31900000	58500000	26300000	41500000	77200000	53200000	85600000	9680000	55500000	60400000	54000000	14200000	41100000	49700000	41200000	50300000	88900000	60100000	67800000	70600000	95900000	75400000	66400000	87500000	109000000	70100000	93300000	149000000	43200000	95500000	65300000	23400000	54400000	21900000	81800000	151000000	128000000	71100000	139000000	37200000	51900000	81200000	57600000
Apolipoprotein C-III	1580000000	800000000	1080000000	920000000	916000000	694000000	799000000	1360000000	1540000000	1400000000	1080000000	761000000	1370000000	1410000000	511000000	557000000	650000000	2590000000	2110000000	1670000000	1230000000	1690000000	1080000000	1400000000	2070000000	771000000	1630000000	1980000000	1230000000	894000000	2110000000	375000000	2030000000	1150000000	1140000000	1340000000	971000000	909000000	1850000000	2900000000	1590000000	1820000000	1950000000	4350000000	2920000000	1180000000
Immunoglobulin heavy constant gamma 3	1480000	621000	3120000	538000	570000	456000	656000	1200000	1110000	993000	0	326000	1110000	887000	1060000	377000	626000	747000	477000	0	2630000	185000	730000	339000	650000	1000000	0	226000	73600	0	658000	269000	238000	1130000	0	432000	0	483000	131000	746000	0	102000	0	982000	1210000	333000
Carboxypeptidase N subunit 2	49500000	34700000	36800000	31800000	44900000	34200000	28800000	58200000	47700000	58000000	25700000	26800000	35200000	41500000	21100000	34400000	18000000	63000000	65600000	92400000	36400000	58800000	56300000	50000000	71000000	46400000	78900000	59600000	61200000	73000000	71500000	37900000	71400000	18100000	52700000	42400000	38500000	51700000	60700000	84700000	66900000	84400000	38100000	32900000	60000000	62300000
Vitamin K-dependent protein S	27800000	15800000	23400000	24600000	27300000	30300000	31200000	39000000	28000000	25900000	21100000	27700000	25600000	34900000	20100000	17800000	24000000	33300000	32400000	27700000	26300000	15800000	36400000	28400000	30900000	33900000	36900000	29800000	31800000	29900000	34900000	25900000	56000000	31700000	43600000	19700000	25100000	24700000	43300000	50800000	29200000	56800000	39900000	32000000	45700000	26100000
Complement factor H	525000000	465000000	488000000	319000000	300000000	316000000	298000000	650000000	398000000	465000000	321000000	399000000	430000000	574000000	364000000	310000000	355000000	451000000	529000000	468000000	364000000	250000000	362000000	407000000	704000000	542000000	773000000	553000000	402000000	798000000	719000000	354000000	725000000	416000000	359000000	269000000	384000000	388000000	664000000	755000000	469000000	935000000	488000000	699000000	772000000	372000000
Talin-1	0	0	0	0	0	0	0	177000	954000	866000	0	0	0	300000	94100	570000	122000	0	0	0	0	0	0	35200	0	0	97100	0	33000	0	0	0	0	0	0	0	0	0	77600	0	0	175000	0	0	0	0
Thymosin beta-4	356000	82300	17400	0	6950	245000	19400	3170000	12600000	15100000	632000	457000	2110000	9040000	2320000	6890000	1420000	0	0	0	34300	48800	0	307000	0	13300	75700	0	0	0	1250	0	95400	0	0	0	0	10600	511000	0	0	8750000	0	192000	174000	0
Complement C3	3830000000	4520000000	3780000000	3270000000	4470000000	3730000000	3660000000	4750000000	5840000000	3800000000	3470000000	4340000000	3990000000	3970000000	5170000000	3420000000	4260000000	5330000000	3970000000	4750000000	4080000000	3260000000	4560000000	3780000000	4650000000	5290000000	6180000000	4380000000	4560000000	6280000000	4720000000	3010000000	5020000000	4670000000	4760000000	4120000000	4020000000	4530000000	4820000000	5660000000	3770000000	6850000000	4430000000	4820000000	5490000000	4420000000
APOC4-APOC2 readthrough (NMD candidate)	184000000	113000000	141000000	121000000	155000000	130000000	119000000	349000000	215000000	312000000	134000000	87000000	173000000	247000000	78400000	129000000	78900000	226000000	308000000	209000000	239000000	198000000	62400000	252000000	482000000	257000000	399000000	324000000	119000000	223000000	536000000	75200000	535000000	176000000	137000000	287000000	154000000	148000000	442000000	412000000	224000000	501000000	176000000	515000000	362000000	253000000
Hepatocyte growth factor activator	437000	232000	0	283000	109000	733000	57500	0	86900	0	143000	217000	305000	0	441000	0	409000	0	656000	0	211000	1050000	0	730000	31900	333000	2040000	146000	0	1010000	660000	774000	1600000	67300	1610000	476000	934000	385000	0	740000	550000	1390000	477000	197000	487000	261000
Immunoglobulin heavy variable 1-18	488000	585000	817000	479000	250000	664000	225000	720000	949000	156000	0	436000	425000	152000	301000	193000	160000	280000	438000	0	663000	283000	447000	113000	534000	173000	0	185000	0	59600	101000	280000	104000	125000	0	672000	0	0	0	133000	90900	318000	0	196000	258000	167000
Vitronectin	579000000	682000000	831000000	590000000	593000000	597000000	568000000	676000000	952000000	589000000	662000000	887000000	685000000	694000000	748000000	553000000	640000000	703000000	762000000	815000000	675000000	825000000	723000000	755000000	689000000	845000000	836000000	796000000	737000000	728000000	802000000	571000000	847000000	738000000	668000000	756000000	712000000	685000000	675000000	733000000	1040000000	928000000	785000000	816000000	828000000	796000000
N-acetylmuramoyl-L-alanine amidase	43300000	10700000	29700000	13700000	17700000	15700000	6010000	46700000	17600000	32400000	5570000	16100000	6130000	27900000	11800000	11900000	9940000	8090000	37900000	23100000	24200000	19300000	23900000	24600000	52700000	17000000	30700000	22800000	16000000	37600000	46000000	10600000	49500000	24200000	17200000	23200000	19100000	25100000	62500000	40600000	36900000	80800000	7880000	14000000	41100000	23200000
Zinc finger protein 75D	9630000	1600000	2890000	6900000	4990000	6620000	1830000	11600000	170000	14700000	0	7450000	3440000	8560000	7040000	3820000	3760000	1930000	6970000	38000	6560000	92900	141000	8380000	4600000	1720000	3000000	3110000	3150000	4600000	2150000	2590000	11100000	6450000	355000	1230000	27700	3120000	2780000	2620000	262000	3460000	51000	5980000	2220000	3970000
Signal-induced proliferation-associated 1-like protein 1	0	3190000	5560000	4980000	4630000	3370000	1460000	0	12800000	0	1470000	1840000	1320000	2640000	2270000	4500000	2340000	2490000	2390000	811000	5480000	1870000	2230000	963000	0	4270000	0	1090000	815000	0	1230000	1750000	2230000	5010000	1630000	0	814000	821000	0	0	2230000	0	1460000	2980000	0	2840000
ATP-dependent RNA helicase DHX29	1150000	1100000	632000	528000	746000	573000	754000	0	0	297000	1540000	1140000	1240000	643000	1440000	273000	494000	896000	464000	1010000	551000	279000	1990000	398000	564000	372000	0	180000	989000	300000	530000	535000	301000	219000	0	346000	1090000	914000	194000	260000	875000	316000	1120000	684000	0	290000
Prolyl endopeptidase-like	333000	231000	0	1110000	33200	1310000	297000	94200	1850000	29800	145000	1110000	843000	75500	192000	1930000	1270000	1700000	3170000	3910000	1480000	1970000	1430000	3710000	25000	3090000	1190000	4900000	2380000	1510000	1530000	2050000	0	808000	2460000	1960000	797000	59600	138000	431000	833000	0	842000	255000	0	2050000
Immunoglobulin lambda-like polypeptide 5	84200000	205000000	107000000	118000000	150000000	127000000	177000000	83500000	119000000	95300000	55500000	84600000	140000000	114000000	168000000	92200000	98900000	141000000	103000000	37200000	204000000	66500000	50000000	67400000	156000000	63300000	85100000	54300000	66300000	91800000	147000000	125000000	103000000	125000000	74100000	110000000	71200000	124000000	75300000	110000000	48600000	101000000	56400000	170000000	127000000	80100000
Phosphatidylcholine-sterol acyltransferase	5830000	4420000	5570000	3750000	4450000	5890000	2310000	6400000	5470000	7650000	2960000	4800000	4140000	6180000	5720000	2290000	2380000	6090000	6290000	5490000	3990000	6680000	4270000	6770000	7290000	5120000	6810000	8830000	5730000	7590000	10200000	2670000	15500000	4500000	4690000	3740000	3010000	3080000	9690000	8180000	7580000	9140000	2360000	6610000	8950000	5970000
Complement C5	110000000	139000000	96500000	95200000	167000000	131000000	118000000	132000000	123000000	97000000	108000000	126000000	90500000	107000000	146000000	131000000	136000000	175000000	110000000	208000000	120000000	99400000	166000000	146000000	130000000	152000000	125000000	115000000	179000000	176000000	141000000	116000000	206000000	133000000	177000000	128000000	166000000	131000000	109000000	136000000	176000000	147000000	111000000	148000000	119000000	141000000
Serum paraoxonase/arylesterase 1	38700000	32500000	124000000	35900000	35700000	66500000	37400000	99400000	51300000	125000000	70500000	35500000	47400000	129000000	44300000	33100000	74000000	48700000	86000000	111000000	54600000	58400000	51300000	86500000	133000000	47600000	49200000	117000000	87600000	64500000	87500000	44200000	144000000	55800000	52400000	69900000	77300000	73200000	136000000	94500000	76300000	101000000	49100000	60200000	169000000	77500000
IQ domain-containing protein M	32500000	39400000	39700000	50800000	67500000	71900000	45700000	29600000	36100000	35800000	104000000	48700000	106000000	40700000	19400000	39700000	61800000	46400000	24700000	54800000	45400000	15400000	33800000	40400000	34800000	44300000	34200000	39800000	38000000	43400000	15800000	47100000	25100000	71800000	33000000	21600000	50700000	36700000	29900000	34300000	26500000	23800000	108000000	23000000	23000000	47300000
Ficolin-3	5190000	8870000	6500000	6520000	5840000	8570000	12200000	5560000	6280000	1660000	9730000	5280000	6180000	4880000	4370000	4540000	2310000	16600000	3090000	10000000	6210000	2030000	4290000	4670000	89500	9040000	2730000	5560000	2600000	483000	4230000	4960000	4250000	2700000	3830000	5640000	8850000	5680000	3270000	984000	4520000	4390000	10700000	5050000	7110000	3010000
Complement C2	11400000	2760000	6610000	2450000	7340000	3940000	4220000	12300000	7490000	14800000	3890000	6460000	3460000	6300000	3030000	14400000	10500000	6060000	5640000	13600000	2780000	4600000	8490000	3420000	11200000	5870000	12900000	9940000	10200000	15300000	12600000	5480000	9350000	9080000	12300000	13300000	6320000	9080000	10900000	17200000	7280000	21400000	5120000	4400000	11800000	8480000
Pyruvate dehydrogenase protein X component mitochondrial	4030000	209000	1700000	610000	1100000	1210000	300000	3200000	988000	5640000	1570000	1490000	345000	2570000	81700	1180000	690000	80400	2600000	893000	1530000	915000	1380000	661000	5430000	1200000	4340000	3220000	1880000	6800000	2120000	0	2360000	731000	1320000	2820000	477000	2180000	3650000	7800000	464000	3780000	567000	664000	9950000	1250000
Plasma kallikrein	52900000	59500000	64600000	62300000	41900000	58000000	79900000	59600000	34500000	56800000	58100000	65300000	48600000	52700000	64900000	41800000	45900000	95500000	51600000	44000000	62300000	21900000	40100000	65400000	63800000	46000000	74300000	33100000	59000000	68500000	47600000	47500000	58500000	39500000	75800000	32800000	59000000	21200000	46900000	75500000	53200000	55400000	49000000	54800000	50900000	45800000
Apolipoprotein D	195000000	75700000	145000000	52200000	81300000	83700000	73500000	105000000	76000000	162000000	92400000	63000000	68500000	112000000	71400000	40200000	67900000	59800000	132000000	140000000	100000000	133000000	106000000	141000000	147000000	66400000	103000000	124000000	101000000	164000000	280000000	106000000	207000000	47700000	64100000	37100000	78800000	72700000	141000000	165000000	72400000	156000000	42600000	105000000	163000000	63000000
Prostaglandin-H2 D-isomerase	883000	0	37800	0	0	363000	0	1060000	85100	863000	168000	299000	295000	607000	0	0	0	79500	904000	0	0	0	0	0	2350000	0	1490000	1090000	0	658000	778000	137000	1400000	0	103000	0	370000	605000	1750000	1770000	222000	2220000	162000	289000	2490000	0
Immunoglobulin lambda variable 3-9	2950000	3150000	1450000	2530000	1450000	1880000	1110000	1030000	3390000	953000	0	1180000	1880000	2850000	2720000	668000	1700000	2550000	859000	0	1590000	413000	186000	1360000	1190000	711000	1130000	1000000	350000	789000	2040000	1900000	475000	1700000	58400	847000	0	2940000	1030000	1160000	33500	1400000	4780	2680000	1250000	1040000
Chorionic somatomammotropin hormone	8560000	2740000	9850000	19900000	15900000	5580000	28200000	3120000	58900000	4720000	0	1200000	3630000	1350000	3640000	527000	153000	53100000	15300000	8770000	21000000	11400000	11800000	14900000	10300000	15100000	51200000	19300000	21100000	1230000	13100000	6500000	10800000	36600000	7900000	15500000	8640000	20300000	26000000	9640000	17900000	5090000	24800000	7250000	9720000	8310000
IgGFc-binding protein	470000	843000	230000	557000	1190000	701000	1290000	1860000	1150000	633000	456000	2060000	1420000	431000	969000	614000	385000	1200000	589000	542000	1770000	735000	1590000	1550000	418000	2050000	927000	583000	642000	2820000	1320000	6290000	1130000	31500000	1110000	994000	371000	3090000	4260000	220000	883000	2020000	179000	725000	1810000	2700000
Complement component C9	116000000	99100000	111000000	83300000	121000000	88300000	90000000	140000000	191000000	70500000	69100000	99100000	168000000	145000000	99200000	147000000	74700000	93200000	112000000	89100000	72700000	67600000	145000000	88400000	136000000	155000000	138000000	173000000	92200000	191000000	211000000	76000000	272000000	101000000	99100000	156000000	82000000	100000000	193000000	120000000	130000000	192000000	104000000	151000000	222000000	104000000
Polymeric immunoglobulin receptor	2370000	2450000	867000	2040000	7810000	2850000	3580000	1710000	4490000	1500000	2920000	3710000	2320000	2090000	4520000	2280000	2630000	3270000	3180000	7250000	1870000	2720000	5780000	2710000	4960000	4560000	2640000	2330000	5180000	14600000	5730000	5010000	2570000	4350000	2570000	3030000	1680000	3980000	5110000	3310000	6440000	8990000	1410000	1330000	2180000	2740000
Nucleolar protein 8	875000	350000	569000	302000	368000	374000	0	1030000	371000	532000	0	1480000	318000	0	0	1130000	789000	64500	351000	0	483000	274000	0	252000	97300	381000	912000	0	0	102000	0	590000	0	231000	16900	1160000	0	140000	228000	157000	0	0	0	0	236000	433000
Lumican	82300000	31200000	74400000	43200000	50500000	43200000	55600000	76100000	58300000	87100000	80300000	44500000	41500000	63600000	37700000	30500000	38600000	54400000	113000000	48100000	36900000	36300000	28000000	46100000	126000000	89000000	106000000	75400000	52400000	83900000	152000000	60800000	110000000	54300000	55500000	25600000	54200000	110000000	116000000	56100000	95600000	119000000	43000000	74300000	125000000	81000000
Apolipoprotein L1	194000000	232000000	102000000	169000000	171000000	144000000	131000000	90300000	98900000	126000000	29500000	148000000	173000000	100000000	152000000	162000000	72300000	108000000	87600000	57300000	156000000	103000000	31100000	129000000	208000000	130000000	113000000	182000000	92400000	80400000	156000000	227000000	155000000	166000000	58600000	98500000	30400000	139000000	151000000	164000000	25000000	165000000	42400000	47000000	108000000	163000000
Ceruloplasmin	9830000	12300000	20400000	15600000	15400000	20600000	11200000	9890000	26300000	9550000	12900000	17600000	11300000	20700000	14200000	18400000	11400000	23300000	7350000	34500000	11700000	19900000	30400000	25100000	14500000	27600000	17700000	27600000	26800000	20100000	23700000	22400000	22200000	12800000	18900000	24600000	17100000	19100000	16500000	13300000	30700000	24800000	20000000	20300000	6740000	29200000
Fibulin-1	20000000	7900000	12600000	13100000	12800000	11600000	11100000	14600000	26600000	27800000	5650000	10800000	13700000	10100000	4810000	24400000	8340000	10500000	25000000	13600000	8980000	16300000	11700000	13200000	28600000	11200000	34600000	17000000	9040000	12400000	24100000	14700000	12400000	22100000	6700000	13900000	16300000	20600000	30600000	9760000	22100000	19300000	19900000	15300000	22200000	19200000
Alpha-1B-glycoprotein	286000000	166000000	320000000	264000000	458000000	349000000	331000000	257000000	356000000	255000000	523000000	329000000	365000000	281000000	357000000	176000000	120000000	434000000	278000000	611000000	443000000	113000000	456000000	372000000	283000000	502000000	441000000	371000000	430000000	416000000	366000000	247000000	391000000	399000000	539000000	428000000	388000000	415000000	278000000	406000000	604000000	580000000	415000000	385000000	309000000	344000000
Glycoprotein hormones alpha chain	638000	0	0	580000	664000	0	1610000	559000	6560000	1110000	149000	0	0	0	0	31700	0	5090000	3960000	1790000	2750000	1570000	1480000	2560000	2010000	3260000	6380000	0	2680000	2100000	5060000	358000	0	7880000	1600000	0	1290000	1060000	4990000	3160000	2670000	0	1190000	1520000	0	0
Prothrombin	241000000	138000000	223000000	93900000	112000000	93200000	96100000	297000000	134000000	290000000	116000000	92100000	113000000	258000000	158000000	91200000	116000000	145000000	191000000	236000000	130000000	153000000	197000000	155000000	318000000	149000000	189000000	222000000	228000000	231000000	330000000	165000000	341000000	109000000	120000000	144000000	107000000	98200000	329000000	339000000	198000000	305000000	151000000	230000000	417000000	161000000
Immunoglobulin heavy constant gamma 2	104000000	328000000	269000000	284000000	236000000	302000000	278000000	72200000	267000000	97500000	297000000	146000000	469000000	169000000	563000000	235000000	298000000	506000000	143000000	264000000	299000000	404000000	600000000	111000000	88800000	263000000	43500000	37400000	413000000	139000000	146000000	330000000	84800000	228000000	547000000	276000000	196000000	252000000	77000000	89500000	171000000	107000000	118000000	172000000	138000000	131000000
Glyceraldehyde-3-phosphate dehydrogenase	0	58900	0	0	0	0	0	0	533000	1290000	0	0	0	373000	0	616000	207000	0	52500	0	0	240000	0	241000	49800	0	0	0	0	0	35300	0	268000	0	0	97900	0	0	159000	0	0	0	0	0	0	0
Insulin-like growth factor-binding protein 4	1080000	19500	673000	98100	382000	0	443000	1070000	224000	773000	0	0	0	856000	236000	0	0	417000	1150000	907000	121000	434000	1500000	328000	1310000	112000	1320000	1210000	0	1040000	1140000	0	2410000	663000	642000	289000	815000	622000	1770000	1860000	832000	1590000	735000	1180000	1960000	128000
Heparin cofactor 2	120000000	197000000	220000000	150000000	507000000	153000000	152000000	198000000	146000000	193000000	194000000	169000000	187000000	230000000	309000000	110000000	200000000	234000000	113000000	130000000	128000000	120000000	257000000	202000000	152000000	82100000	136000000	151000000	149000000	75900000	154000000	156000000	141000000	168000000	292000000	57800000	195000000	193000000	64900000	215000000	243000000	123000000	228000000	139000000	98100000	192000000
Serum amyloid A-1 protein	5570000	4430000	5170000	937000	3300000	591000	943000	3260000	88300000	2650000	1380000	5770000	1120000	19700000	3090000	56300000	5230000	137000	7290000	2980000	1730000	37200000	25200000	5820000	8880000	46200000	3410000	189000000	12500000	324000000	14300000	143000	94500000	6470000	3820000	67900000	1980000	729000	4280000	14200000	5260000	11500000	471000	64000000	6330000	4650000
Phospholipid transfer protein	1670000	455000	1440000	764000	1160000	1260000	764000	1270000	1560000	1500000	548000	1430000	682000	1580000	1030000	1130000	744000	939000	1130000	1360000	535000	1430000	1040000	1160000	1450000	1150000	1340000	1140000	1700000	1880000	1990000	1330000	1310000	748000	1340000	1400000	1350000	1060000	1470000	1360000	938000	1460000	883000	1340000	2550000	1720000
Melanotransferrin	0	0	0	246000	1090000	28800	505000	0	277000	0	423000	98600	720000	543000	1460000	886000	720000	1110000	1120000	1620000	1810000	1080000	1090000	1360000	1230000	443000	0	386000	778000	1330000	356000	899000	488000	0	814000	914000	1160000	1170000	1110000	0	678000	807000	1490000	0	724000	136000
Adiponectin	2630000	4910000	2400000	2480000	3570000	5680000	1030000	750000	1580000	2110000	2770000	898000	3700000	4410000	2070000	2330000	1730000	4100000	2450000	7270000	2050000	1120000	4870000	11800000	3470000	7140000	2270000	2860000	4220000	3780000	5140000	2780000	2430000	3430000	4710000	3110000	5420000	3540000	1460000	1440000	4500000	3910000	3590000	1670000	1910000	3480000
C4b-binding protein alpha chain	84500000	86200000	70400000	49600000	53700000	100000000	33700000	112000000	62000000	98900000	79600000	65300000	67800000	95800000	31300000	65400000	37600000	53400000	88100000	77900000	65400000	29600000	66500000	61700000	111000000	108000000	111000000	94700000	89500000	137000000	101000000	51100000	169000000	115000000	85900000	58700000	63300000	54900000	113000000	148000000	51600000	167000000	52200000	49700000	124000000	79400000
C-reactive protein	3720000	24400000	1310000	1160000	4960000	680000	13600000	1760000	50500000	2040000	1500000	8570000	2310000	8150000	11300000	65000000	5370000	714000	3850000	1390000	1850000	9100000	53400000	23100000	7170000	60100000	13300000	40500000	5660000	58900000	8410000	1820000	28800000	12500000	15800000	30400000	1730000	2700000	1950000	10800000	4280000	42100000	3620000	38200000	21400000	4280000
Trypsin	1710000000	626000000	2030000000	868000000	881000000	718000000	997000000	1990000000	2490000000	1760000000	745000000	1150000000	844000000	1240000000	991000000	1360000000	1010000000	811000000	1110000000	1280000000	902000000	3420000000	1260000000	1010000000	1900000000	851000000	2480000000	1920000000	1630000000	2730000000	1620000000	1540000000	1540000000	1100000000	1220000000	1360000000	1020000000	1020000000	2790000000	2150000000	1400000000	2800000000	868000000	961000000	1590000000	1200000000
Attractin	21000000	15400000	28700000	18000000	23500000	19500000	22200000	31300000	26600000	25300000	29800000	21500000	21300000	23400000	23600000	15100000	17300000	31900000	24200000	32200000	21700000	20900000	24100000	23700000	27500000	24700000	30500000	27600000	19800000	25000000	35100000	18000000	24200000	19500000	29000000	17600000	27200000	30200000	26200000	30000000	34200000	38800000	30400000	25100000	24400000	18600000
Cathelicidin antimicrobial peptide	499000	654000	1230000	814000	569000	752000	1220000	2000000	1610000	2020000	0	785000	837000	1550000	487000	3240000	791000	424000	1380000	121000	912000	558000	87300	597000	1350000	852000	1630000	699000	317000	560000	2930000	430000	2790000	1140000	117000	439000	335000	575000	1600000	1620000	80300	846000	644000	850000	2050000	484000
Immunoglobulin kappa variable 2-24	6280000	4930000	4190000	5240000	483000	6430000	5400000	1120000	6150000	3150000	11300000	4500000	9070000	2870000	12800000	6080000	1520000	3410000	4520000	6160000	4450000	3530000	8810000	3650000	3680000	3390000	1780000	1390000	4370000	2060000	3860000	3480000	1810000	2030000	7720000	3490000	4590000	6980000	1700000	3580000	2850000	2850000	3670000	926000	2900000	3460000
Coagulation factor XIII A chain	177000	327000	294000	386000	476000	67300	284000	316000	605000	563000	0	0	0	46100	349000	290000	151000	115000	563000	512000	398000	782000	470000	360000	0	138000	0	0	738000	0	291000	1570000	372000	456000	0	489000	0	0	228000	0	211000	0	99000	200000	0	418000
Monocyte differentiation antigen CD14	1440000	856000	1070000	641000	1130000	723000	969000	1570000	1570000	1620000	1810000	921000	744000	1450000	599000	885000	724000	827000	854000	1690000	1120000	807000	709000	678000	1460000	936000	4640000	1130000	1260000	4830000	705000	645000	1630000	1580000	1650000	1710000	911000	2340000	2440000	1590000	821000	3840000	1180000	693000	2090000	491000
Alpha-1-antichymotrypsin	946000000	1060000000	887000000	486000000	959000000	427000000	556000000	781000000	1200000000	731000000	649000000	594000000	609000000	811000000	717000000	1110000000	584000000	380000000	986000000	929000000	488000000	776000000	1220000000	768000000	1020000000	1230000000	1020000000	1350000000	453000000	2390000000	1250000000	534000000	1490000000	679000000	858000000	1100000000	511000000	554000000	683000000	956000000	1050000000	2080000000	499000000	647000000	803000000	656000000
Complement C4-B	0	0	1230000	627000	2190000	0	0	765000	0	0	0	0	0	0	0	0	0	0	0	0	0	0	0	0	0	0	0	0	2090000	0	0	0	0	2060000	0	0	2170000	0	0	0	0	0	0	0	0	0
Apolipoprotein F	4600000	989000	2560000	763000	525000	1790000	375000	2990000	3340000	4060000	1210000	1330000	639000	2140000	117000	2400000	189000	1260000	1420000	1820000	1100000	3460000	1890000	1190000	4570000	1010000	1570000	1720000	396000	5200000	2390000	3770000	1820000	2680000	859000	2500000	2860000	1650000	2120000	3470000	1330000	4370000	523000	1920000	2370000	2070000
Ectonucleotide pyrophosphatase/phosphodiesterase family member 2	233000	2420000	107000	352000	58600	4340000	4460000	450000	570000	63600	0	1950000	4020000	299000	30000	1960000	1230000	450000	1470000	2780000	5510000	2550000	1700000	3210000	244000	3350000	9960000	489000	1740000	10400	3700000	1270000	286000	595000	2520000	4160000	240000	687000	2750000	1680000	23200	2170000	2100000	3030000	2980000	4350000
Apolipoprotein M	88100000	46800000	117000000	53300000	72600000	97500000	50500000	119000000	52900000	136000000	86800000	53600000	69800000	125000000	44900000	40700000	55500000	44500000	81700000	115000000	59200000	94300000	65500000	73000000	124000000	52700000	162000000	119000000	56500000	114000000	121000000	43100000	145000000	49500000	73200000	60700000	78400000	68000000	134000000	134000000	88800000	135000000	66800000	78300000	94500000	68300000
Immunoglobulin heavy variable 2-26	2040000	417000	2150000	1450000	1290000	1020000	2280000	559000	5270000	570000	3160000	672000	2820000	248000	3470000	1300000	4660000	1610000	792000	719000	637000	2290000	2240000	1030000	957000	1090000	285000	1310000	360000	476000	880000	1320000	247000	1010000	2350000	1260000	1240000	1960000	240000	516000	694000	1270000	214000	481000	790000	445000
Clusterin	817000000	480000000	789000000	544000000	496000000	668000000	503000000	860000000	563000000	802000000	745000000	556000000	566000000	821000000	491000000	313000000	411000000	818000000	907000000	790000000	646000000	525000000	557000000	568000000	874000000	581000000	957000000	920000000	679000000	939000000	1120000000	477000000	1120000000	559000000	684000000	407000000	704000000	576000000	815000000	1030000000	471000000	1790000000	671000000	936000000	1040000000	558000000
Complement factor I	75200000	51400000	59700000	35600000	60700000	29800000	41400000	75100000	35900000	58800000	15600000	38800000	37900000	76300000	55000000	38100000	36200000	65100000	82700000	47300000	18600000	32900000	54100000	25300000	87400000	59600000	82500000	85700000	52200000	86600000	86700000	46200000	94700000	45200000	49300000	41700000	32100000	40000000	84700000	87100000	48500000	108000000	29800000	65300000	62000000	49700000
Poliovirus receptor	974000	0	204000	0	0	852000	781000	949000	0	774000	0	852000	873000	759000	1220000	574000	545000	1030000	377000	0	729000	0	0	0	460000	891000	1640000	241000	0	1280000	563000	260000	51300	555000	0	345000	0	540000	471000	1020000	0	1430000	0	730000	960000	93900
Immunoglobulin heavy constant gamma 1	1020000000	1130000000	829000000	1240000000	1950000000	1170000000	891000000	1060000000	922000000	797000000	948000000	705000000	707000000	783000000	653000000	667000000	704000000	735000000	784000000	904000000	1210000000	914000000	1040000000	921000000	1580000000	1160000000	1030000000	426000000	629000000	798000000	622000000	116000000	657000000	776000000	387000000	552000000	281000000	251000000	742000000	1080000000	1130000000	1130000000	1550000000	1760000000	828000000	580000000
SAA2-SAA4 readthrough	62100000	102000000	96300000	91800000	160000000	62500000	134000000	89900000	121000000	81400000	71900000	131000000	98800000	165000000	135000000	124000000	113000000	140000000	90400000	48000000	101000000	110000000	69300000	134000000	89300000	112000000	65700000	195000000	58500000	243000000	225000000	64100000	208000000	47200000	87100000	132000000	73000000	70100000	65100000	125000000	84100000	176000000	31700000	130000000	94300000	179000000
DmX-like protein 1	0	0	0	1460000	449000	0	342000	0	6220000	0	0	0	0	0	0	0	1200000	0	77200	0	0	1210000	561000	0	0	212000	0	0	0	0	0	0	0	0	0	577000	0	0	0	0	0	0	625000	0	289000	367000
Immunoglobulin kappa variable 2D-30	1250000	378000	1410000	460000	1230000	0	1060000	1250000	85000	716000	1520000	84900	781000	0	735000	216000	263000	344000	1760000	1310000	564000	567000	1310000	687000	834000	442000	541000	173000	253000	1970000	1270000	489000	1670000	238000	448000	486000	833000	1040000	2420000	896000	2050000	2670000	1130000	989000	1720000	500000
Vacuolar protein sorting-associated protein 28 homolog	0	0	0	0	0	0	0	0	0	811000	0	0	0	0	0	0	0	0	0	0	0	0	0	0	0	0	0	0	0	0	0	0	1800000	0	0	0	0	10300	0	0	0	0	0	0	0	0
Inter-alpha-trypsin inhibitor heavy chain H2	570000000	518000000	433000000	461000000	582000000	689000000	571000000	731000000	688000000	739000000	301000000	608000000	606000000	634000000	424000000	413000000	447000000	655000000	683000000	1000000000	711000000	742000000	452000000	798000000	796000000	640000000	970000000	827000000	682000000	911000000	1040000000	502000000	902000000	673000000	512000000	858000000	516000000	737000000	1110000000	931000000	513000000	1070000000	480000000	699000000	915000000	784000000
Platelet factor 4	482000	1440000	1650000	805000	1630000	18000000	2020000	2190000	15900000	9490000	15900000	10900000	14400000	1980000	5280000	11100000	6800000	1910000	0	6260000	2140000	2650000	2580000	10500000	361000	1410000	7870000	262000	2950000	0	5230000	1210000	1350000	1490000	22000000	454000	25600000	25300000	367000	65600	0	16600000	6670000	166000	785000	538000
Immunoglobulin lambda constant 7	2820000	2330000	2240000	718000	6380000	1910000	5780000	1660000	1130000	0	139000	2140000	68900	1810000	3800000	2410000	2950000	2860000	1010000	127000	4530000	148000	907000	3060000	3200000	331000	5180	556000	1080000	620000	4160000	2810000	457000	1870000	182000	1370000	132000	906000	6540000	5580000	867000	437000	45700	15600000	5770000	444000
Hyaluronan-binding protein 2	14200000	16200000	13900000	19400000	14000000	21100000	19100000	17900000	29700000	12200000	21800000	17800000	27300000	18600000	25800000	12100000	20100000	29300000	18500000	20900000	21200000	13900000	20700000	20900000	15300000	23900000	25600000	26300000	16600000	17200000	20700000	11700000	18800000	21100000	23800000	14700000	27000000	22000000	18900000	18700000	29700000	26000000	25200000	22600000	39500000	24400000
Immunoglobulin lambda variable 3-27	63800	346000	322000	569000	414000	54400	0	118000	699000	268000	18700	0	23700	1430000	272000	95000	186000	336000	108000	0	1360000	274000	728000	290000	2050000	520000	0	245000	413000	0	503000	137000	95800	0	364000	902000	89200	385000	223000	821000	143000	0	65200	525000	1110000	125000
L-lactate dehydrogenase B chain	198000	293000	580000	142000	0	369000	0	358000	1690000	570000	0	398000	0	426000	0	554000	310000	217000	44800	177000	271000	322000	32900	674000	623000	805000	20300	106000	250000	1320000	1160000	0	828000	338000	127000	424000	0	73100	0	0	193000	0	0	225000	351000	256000
Girdin	352000	4970000	4710000	3490000	7380000	2040000	5730000	491000	5900000	242000	1700000	4240000	5370000	848000	5390000	1400000	4030000	2580000	349000	4540000	2270000	5130000	4580000	2020000	386000	3500000	469000	557000	3580000	351000	909000	5130000	483000	1770000	8280000	258000	1580000	4290000	528000	105000	4160000	525000	7780000	1570000	1140000	1690000
Probable E3 ubiquitin-protein ligase MARCH10	6120000	8200000	12600000	10200000	11800000	3440000	11200000	5640000	25000000	0	11300	6090000	9170000	8440000	12000000	2440000	9550000	14000000	9630000	49200	8030000	17200000	90900	7980000	4790000	9160000	3330000	6630000	1020000	3490000	8620000	5510000	9330000	4290000	69300	6570000	32000	7160000	8700000	5360000	159000	5300000	36500	7170000	26100000	7670000
Zinc-alpha-2-glycoprotein	428000000	221000000	493000000	196000000	242000000	381000000	188000000	586000000	276000000	472000000	359000000	311000000	281000000	411000000	206000000	176000000	213000000	255000000	518000000	309000000	374000000	252000000	375000000	351000000	403000000	275000000	439000000	328000000	310000000	344000000	611000000	284000000	477000000	312000000	258000000	224000000	226000000	313000000	478000000	697000000	272000000	574000000	237000000	414000000	503000000	189000000
Gamma-tubulin complex component 6	0	653000	650000	618000	208000	593000	111000	0	853000	929000	557000	0	870000	1500000	113000	216000	176000	275000	908000	560000	594000	1200000	857000	183000	849000	1340000	675000	324000	245000	910000	1080000	470000	469000	561000	666000	886000	259000	371000	0	300000	1420000	0	640000	1140000	0	577000
Myosin-9	10600000	14700000	5810000	16900000	15800000	17900000	16600000	13800000	28800000	16300000	698000	14700000	27200000	9010000	7190000	28300000	11700000	201000	25500000	526000	13300000	5770000	2220000	11000000	11400000	9410000	9300000	21600000	2960000	16100000	10600000	48200	7130000	17400000	826000	23200000	421000	7100000	7410000	6690000	1070000	9710000	656000	14400000	10300000	23300000
Immunoglobulin lambda variable 3-10	295000	48100	209000	0	0	0	30200	214000	344000	114000	0	41700	333000	620000	0	0	0	0	0	0	0	0	0	166000	1510000	356000	30000	596000	0	0	2160000	0	0	138000	175000	0	0	0	195000	470000	0	333000	0	1180000	538000	43300
Actin cytoplasmic	4960000	8120000	8490000	3160000	3100000	3890000	6180000	22400000	86300000	65600000	1240000	3320000	3760000	31800000	34700000	48700000	14700000	1840000	5020000	4440000	6090000	11700000	6670000	15100000	3690000	3280000	13200000	5490000	8620000	20500000	5590000	2330000	11000000	3600000	1980000	8950000	2150000	2760000	14200000	3290000	3110000	15700000	2270000	5680000	7470000	2940000
Afamin	99200000	71000000	123000000	79800000	80300000	91900000	78300000	173000000	93700000	148000000	52400000	106000000	85200000	107000000	42600000	102000000	67800000	53900000	143000000	86700000	69100000	109000000	76600000	112000000	115000000	79700000	164000000	124000000	120000000	56100000	164000000	61100000	109000000	115000000	61000000	66900000	49900000	125000000	182000000	165000000	119000000	151000000	110000000	88600000	143000000	78700000
Immunoglobulin lambda joining 3 (Fragment)	126000000	2170000	1780000	7190000	2260000	1500000	1080000	186000000	1780000	121000000	3090000	1550000	3150000	1130000	270000000	1560000	1500000	1850000	1030000	250000000	3150000	3620000	3580000	1200000	101000000	4260000	595000	344000	3470000	3850000	1180000	1910000	188000	1690000	2970000	972000	3070000	2410000	827000	181000000	249000	608000	2370000	712000	1090000	1400000
Galectin-3-binding protein	23700000	30400000	54900000	31800000	43800000	31700000	39100000	38700000	57200000	25300000	15500000	39900000	33400000	34200000	53800000	31200000	26600000	59500000	46700000	35600000	30500000	27200000	16000000	57100000	46900000	29700000	31800000	55200000	39800000	36600000	24400000	8800000	33000000	61000000	31000000	45100000	44900000	70100000	74000000	55100000	29000000	54600000	66400000	60200000	51500000	47700000
Immunoglobulin lambda-like polypeptide 1	29000000	60500000	42100000	63200000	66900000	48900000	54000000	29000000	38100000	30500000	59900000	28200000	71200000	35400000	95200000	30400000	37200000	81000000	34100000	54200000	76200000	47200000	89800000	22700000	31700000	45300000	19500000	13700000	55700000	20200000	42000000	56000000	15600000	45000000	83900000	27400000	53800000	49700000	22500000	27700000	73700000	30500000	59900000	42700000	48300000	20000000
Kininogen-1	524000000	237000000	431000000	215000000	417000000	269000000	214000000	575000000	331000000	498000000	183000000	259000000	324000000	409000000	223000000	303000000	201000000	491000000	488000000	359000000	330000000	316000000	390000000	185000000	641000000	242000000	812000000	350000000	356000000	596000000	365000000	305000000	345000000	464000000	335000000	326000000	254000000	266000000	482000000	646000000	357000000	660000000	222000000	470000000	554000000	275000000
Complement C1q subcomponent subunit B	72200000	31200000	47500000	25200000	24700000	26500000	29000000	65500000	44000000	44900000	33800000	18800000	27400000	55500000	23900000	17300000	20400000	28000000	68300000	16500000	29400000	27800000	33900000	17000000	78100000	35000000	38200000	47600000	23100000	67700000	84900000	45900000	69300000	34200000	33000000	29300000	24500000	31600000	48300000	71200000	32400000	86900000	20900000	63400000	68200000	21000000
Plasma serine protease inhibitor	1430000	0	1100000	1170000	1090000	282000	139000	3500000	135000	1990000	71100	664000	147000	1430000	509000	128000	862000	549000	2890000	185000	86900	14900000	1070000	78800	1850000	0	4660000	1630000	1350000	2170000	1360000	659000	2590000	2280000	1600000	3000000	114000	765000	2620000	3240000	301000	4570000	35900	134000	1350000	989000
Retinol-binding protein	4890000	11900000	11500000	10900000	29400000	16400000	10800000	10600000	8040000	9630000	16900000	23500000	16700000	7550000	10600000	6330000	22000000	26100000	14700000	36600000	26700000	21500000	30300000	40300000	11800000	12900000	8010000	9260000	16900000	7600000	16200000	15800000	23900000	24700000	27300000	15600000	14600000	16800000	11300000	33400000	11400000	11900000	11400000	9020000	14500000	22100000
Tetraspanin	22200	12900	0	32200	420000	261000	84700	0	113000	0	0	310000	16100	0	0	430000	156000	319000	0	171000	0	88900	133000	0	38200	0	0	0	208000	0	0	49300	0	36800	557000	83900	0	78600	23500	2270	31500	0	0	0	11800	5770
Solute carrier family 25 member 35	1370000	378000	1490000	1630000	1930000	708000	1060000	2340000	1320000	1880000	1380000	677000	965000	1430000	1200000	1240000	590000	1340000	2140000	1300000	642000	822000	1720000	812000	1910000	770000	2920000	2120000	1570000	2890000	1870000	1520000	1110000	782000	1470000	1180000	1700000	1130000	2450000	1470000	2000000	5600000	772000	1510000	1270000	575000
Uncharacterized protein (Fragment)	5030000	9930000	7160000	7560000	12000000	5730000	5350000	4470000	6050000	7340000	8250000	4990000	5480000	4130000	5010000	3000000	4460000	8940000	4620000	3260000	7830000	5620000	10100000	3290000	4510000	5420000	2980000	1450000	4780000	2710000	10700000	4140000	7280000	2800000	5450000	3310000	8920000	9160000	3580000	2980000	9140000	3380000	11700000	17800000	3470000	3740000
Armadillo-like helical domain-containing protein 3	0	450000	0	3330000	171000000	36300000	5890000	0	12400000	0	5050000	77200000	2850000	0	1540000	45500000	12300000	105000000	41900000	5080000	51000000	32200000	16500000	42300000	63700000	6530000	0	27300000	71200000	43700000	0	82600000	0	61800000	67500000	34100000	2900000	8520000	0	62500000	5080000	120000000	2310000	0	0	42700000
Immunoglobulin heavy constant alpha 1	1090000000	1180000000	1210000000	819000000	867000000	1240000000	506000000	925000000	680000000	1200000000	716000000	214000000	862000000	1250000000	1530000000	442000000	427000000	501000000	1190000000	1630000000	1520000000	466000000	793000000	798000000	1510000000	600000000	1130000000	687000000	663000000	1200000000	2240000000	1050000000	534000000	672000000	930000000	637000000	870000000	1400000000	1250000000	1250000000	1460000000	935000000	876000000	863000000	1150000000	536000000
Complement C4-A	0	0	0	0	1170000	0	0	0	0	0	0	0	110000	0	0	0	1310000	0	0	0	0	0	0	0	1900000	0	3380000	0	0	7100000	0	0	0	0	0	0	0	1290000	0	0	0	0	0	0	0	0
A-kinase anchor protein 13	4460000	5930000	7400000	6580000	9460000	4570000	9840000	5320000	12400000	6630000	9560000	7540000	8620000	5500000	9110000	6430000	7620000	9090000	6060000	12800000	7270000	20600000	11200000	7590000	5210000	7300000	9930000	0	10700000	6980000	7680000	11200000	5210000	6930000	11300000	6460000	10300000	9470000	8430000	6600000	15400000	8780000	11100000	3810000	4880000	7770000
Tyrosine-protein phosphatase non-receptor type 6	4470000	8070000	1530000	6190000	5880000	4090000	4390000	1240000	1780000	1730000	0	4330000	6770000	920000	3320000	6160000	1500000	1220000	1940000	10500	5230000	2900000	0	3880000	5540000	3800000	1320000	2340000	508000	1250000	3790000	8640000	1880000	6300000	0	2560000	0	4090000	1970000	2230000	0	1430000	0	652000	1160000	5600000
C4b-binding protein beta chain	7410000	6520000	4850000	4540000	8660000	7130000	5920000	9750000	5780000	7460000	10200000	5460000	3120000	7440000	5450000	3760000	3760000	8900000	9630000	9220000	5880000	3180000	7050000	4280000	7080000	9050000	7530000	5510000	8000000	4310000	9370000	4700000	10400000	6930000	8380000	3580000	8810000	4310000	7170000	12800000	10800000	8630000	9200000	6000000	11200000	5600000
Fc of IgG low affinity IIIa receptor isoform 1	1230000	5160	643000	113000	736000	66300	28100	1060000	794000	539000	267000	33700	141000	660000	78200	596000	227000	0	442000	0	55900	623000	872000	24900	1390000	213000	2710000	428000	37100	2150000	857000	280000	1030000	292000	47200	590000	0	203000	681000	773000	70300	2760000	0	380000	1480000	112000
Low affinity immunoglobulin gamma Fc region receptor III-A (Fragment)	1230000	5160	643000	113000	736000	66300	28100	1060000	794000	539000	267000	33700	141000	660000	78200	596000	227000	0	442000	0	55900	623000	872000	24900	1390000	213000	2710000	428000	37100	2150000	857000	280000	1030000	292000	47200	590000	0	203000	681000	773000	70300	2760000	0	380000	1480000	112000
P-selectin	68900	25500	0	0	0	197000	0	28300	0	0	0	56300	176000	11800	0	0	0	0	502000	0	10000	0	0	9520	43400	0	448000	350000	0	0	248000	125000	618000	0	7570	0	14700	0	234000	172000	0	399000	52000	147000	356000	0
Brefeldin A-inhibited guanine nucleotide-exchange protein 3	952000	3750000	2050000	4060000	55700	3040000	458000	305000	3770000	834000	2890000	3540000	2700000	6380000	1480000	2530000	11500000	60100	2330000	5660000	3410000	10600000	619000	4270000	2200000	6080000	1090000	2630000	20400000	0	1910000	7430000	358000	3050000	3310000	2100000	4730000	3660000	1140000	499000	1820000	1240000	3710000	826000	1320000	2580000
Ras-related protein Rab-26	2420000	190000	170000	300000	101000	1010000	1300000	1350000	915000	1040000	528000	634000	399000	1870000	903000	937000	969000	50400	1680000	1260000	1230000	1440000	491000	1360000	1870000	132000	810000	631000	627000	519000	820000	352000	955000	1310000	1590000	973000	41800	1210000	496000	1710000	1730000	1810000	1340000	874000	631000	857000
Inactive glutathione hydrolase 2	14400000	4130000	14200000	5820000	12700000	6850000	10600000	17100000	10600000	17600000	8890000	8620000	6410000	15900000	5330000	6280000	7680000	10300000	14400000	8300000	4980000	17500000	12000000	4780000	16500000	6430000	22300000	20000000	8520000	21200000	12600000	6730000	16800000	8800000	12800000	8680000	10300000	5030000	17300000	15300000	12400000	19700000	6520000	11300000	12900000	7420000
Potassium voltage-gated channel subfamily A member 3	14400000	4130000	14200000	5820000	12700000	6850000	10600000	17100000	10600000	17600000	8890000	8620000	6410000	15900000	5330000	6280000	7680000	10300000	14400000	8300000	4980000	17500000	12000000	4780000	16500000	6430000	22300000	20000000	8520000	21200000	12600000	6730000	16800000	8800000	12800000	8680000	10300000	5030000	17300000	15300000	12400000	19700000	6520000	11300000	12900000	7420000
Putative glutathione hydrolase 3 proenzyme	14400000	4130000	14200000	5820000	12700000	6850000	10600000	17100000	10600000	17600000	8890000	8620000	6410000	15900000	5330000	6280000	7680000	10300000	14400000	8300000	4980000	17500000	12000000	4780000	16500000	6430000	22300000	20000000	8520000	21200000	12600000	6730000	16800000	8800000	12800000	8680000	10300000	5030000	17300000	15300000	12400000	19700000	6520000	11300000	12900000	7420000
Glutathione hydrolase 1 proenzyme	14400000	4130000	14200000	5820000	12700000	6850000	10600000	17100000	10600000	17600000	8890000	8620000	6410000	15900000	5330000	6280000	7680000	10300000	14400000	8300000	4980000	17500000	12000000	4780000	16500000	6430000	22300000	20000000	8520000	21200000	12600000	6730000	16800000	8800000	12800000	8680000	10300000	5030000	17300000	15300000	12400000	19700000	6520000	11300000	12900000	7420000
Potassium voltage-gated channel subfamily A member 2	14400000	4130000	14200000	5820000	12700000	6850000	10600000	17100000	10600000	17600000	8890000	8620000	6410000	15900000	5330000	6280000	7680000	10300000	14400000	8300000	4980000	17500000	12000000	4780000	16500000	6430000	22300000	20000000	8520000	21200000	12600000	6730000	16800000	8800000	12800000	8680000	10300000	5030000	17300000	15300000	12400000	19700000	6520000	11300000	12900000	7420000
Histone H2B type 1-M	0	0	0	0	0	0	0	193000	57800	210000	0	0	0	0	0	74400	0	0	224000	27500	0	729000	147000	564000	119000	0	464000	0	0	4150000	309000	0	384000	0	0	521000	44400	7760	304000	0	0	211000	0	0	169000	0
Histone H2B type F-S	0	0	0	0	0	0	0	193000	57800	210000	0	0	0	0	0	74400	0	0	224000	27500	0	729000	147000	564000	119000	0	464000	0	0	4150000	309000	0	384000	0	0	521000	44400	7760	304000	0	0	211000	0	0	169000	0
Plasma protease C1 inhibitor	10300000	13300000	8530000	8540000	9230000	15400000	8910000	7790000	5590000	7410000	14300000	20700000	2260000	5730000	12000000	9080000	7540000	12600000	2950000	8510000	8210000	2300000	12200000	10800000	7950000	17400000	2300000	5500000	13900000	934000	1940000	6310000	6580000	16400000	18500000	16000000	15500000	7780000	9090000	10600000	11200000	13600000	17000000	6360000	13400000	8000000
Immunoglobulin kappa variable 2D-28	21000000	4670000	44800000	52300000	37000000	388000	4220000	11400000	40600000	8600000	34300000	524000	69000000	892000	14600000	32400000	1830000	23100000	1860000	40400000	64400000	30100000	64600000	5890000	29800000	53500000	6210000	0	73700000	11500000	0	43800000	19600000	3830000	21300000	32700000	45500000	291000	15000000	11000000	30600000	13400000	62600000	1480000	18200000	3700000
Immunoglobulin kappa variable 2-28	21000000	4670000	44800000	52300000	37000000	388000	4220000	11400000	40600000	8600000	34300000	524000	69000000	892000	14600000	32400000	1830000	23100000	1860000	40400000	64400000	30100000	64600000	5890000	29800000	53500000	6210000	0	73700000	11500000	0	43800000	19600000	3830000	21300000	32700000	45500000	291000	15000000	11000000	30600000	13400000	62600000	1480000	18200000	3700000
Inter-alpha-trypsin inhibitor heavy chain H1	189000000	259000000	193000000	248000000	316000000	328000000	277000000	246000000	512000000	204000000	338000000	324000000	279000000	228000000	121000000	206000000	265000000	329000000	215000000	481000000	363000000	386000000	253000000	384000000	241000000	382000000	302000000	238000000	398000000	268000000	301000000	186000000	172000000	324000000	326000000	477000000	374000000	353000000	353000000	326000000	232000000	365000000	294000000	290000000	310000000	381000000
Immunoglobulin heavy variable 3-74	5950000	11000000	11200000	12700000	17500000	15900000	156000	2160000	8480000	3960000	21000000	11500000	1250000	5540000	2000000	10400000	1700000	294000	6050000	18900000	24700000	21900000	27000000	10100000	6180000	11200000	5320000	2600000	18300000	3150000	7940000	1200000	3310000	18500000	25900000	9570000	18400000	7950000	5940000	4690000	22200000	6570000	64700	4760000	5180000	11400000
Coagulation factor X	4990000	8160000	14900000	5680000	13900000	6820000	9320000	3150000	7130000	7860000	11000000	7350000	8060000	2320000	10900000	4520000	528000	10400000	12400000	15900000	7180000	7570000	13200000	12100000	12500000	10100000	22900000	16000000	10200000	4180000	17700000	5470000	2750000	6590000	8830000	8440000	9940000	6640000	4690000	4680000	16300000	17300000	9980000	3850000	21400000	705000
Immunoglobulin kappa variable 4-1	31000000	8430000	25300000	18800000	18200000	24700000	2990000	20400000	29000000	28600000	12000000	13800000	20300000	17500000	12400000	22600000	3470000	17800000	28300000	13500000	16300000	19800000	41400000	11000000	51600000	19300000	19100000	11500000	25400000	19200000	25600000	25400000	13000000	23400000	15000000	22000000	17900000	18200000	23100000	18100000	11900000	30900000	9650000	13000000	10900000	18100000
Leucine-rich alpha-2-glycoprotein	297000000	148000000	188000000	95400000	263000000	137000000	170000000	306000000	308000000	239000000	234000000	206000000	144000000	298000000	167000000	272000000	165000000	150000000	146000000	157000000	98300000	145000000	382000000	181000000	331000000	282000000	291000000	408000000	118000000	894000000	170000000	135000000	298000000	231000000	237000000	285000000	153000000	272000000	210000000	212000000	141000000	705000000	208000000	326000000	317000000	120000000
Cholesteryl ester transfer protein	341000	1000000	0	715000	614000	605000	906000	566000	409000	351000	635000	1020000	682000	1130000	232000	1030000	708000	1220000	244000	476000	748000	349000	592000	893000	326000	632000	431000	214000	1110000	277000	749000	779000	432000	828000	1080000	423000	857000	748000	0	270000	1190000	0	281000	608000	0	760000
Pigment epithelium-derived factor	54300000	21700000	43500000	30800000	37600000	30900000	27900000	48100000	42200000	49900000	29000000	36800000	27200000	42400000	25600000	27400000	23700000	69300000	48000000	35200000	32200000	27700000	33700000	32700000	64800000	34500000	92200000	48000000	31500000	48100000	46200000	20300000	62700000	45900000	33600000	35000000	30300000	37300000	70100000	83400000	39000000	72600000	53400000	47200000	67500000	18500000
Immunoglobulin heavy constant epsilon	0	0	0	0	0	0	82100	0	109000	0	0	0	0	0	0	0	0	0	0	0	12800	607000	0	0	0	0	0	0	3800	0	0	66200	0	0	0	0	0	0	0	0	0	0	0	0	8230	0
Cadherin-5	552000	832000	588000	356000	350000	492000	236000	588000	689000	309000	147000	471000	239000	483000	183000	252000	145000	577000	234000	79700	347000	0	0	352000	0	388000	644000	392000	250000	15500	621000	331000	311000	972000	117000	390000	186000	395000	445000	103000	0	802000	0	426000	574000	137000
Dopamine beta-hydroxylase	0	386000	33100	251000	438000	276000	0	0	0	0	0	0	0	17600	0	18600	0	0	0	230000	396000	0	0	209000	0	0	0	0	65900	0	0	70700	0	298000	0	168000	929000	120000	0	0	571000	0	0	0	0	0
Complement C1q subcomponent subunit C	99700000	55000000	76600000	32400000	42300000	46400000	34100000	89600000	53700000	68900000	23400000	37500000	27400000	80000000	27200000	35900000	32100000	16700000	80700000	14300000	54600000	27900000	56500000	35400000	112000000	66000000	57800000	59100000	36500000	95400000	110000000	21500000	88300000	63900000	26100000	33100000	24700000	33300000	69800000	93300000	58100000	113000000	26200000	97800000	108000000	39900000
Low affinity immunoglobulin epsilon Fc receptor	0	0	0	0	15700	0	0	0	0	20800	0	0	37400	2640000	0	116000	0	0	187000	0	32300	109000	585000	0	1620000	18900	2200000	0	0	0	0	0	0	82900	0	3320000	0	0	1650000	0	0	0	0	0	0	0
Centrosomal protein of 192 kDa	0	176000	0	486000	846000	0	901000	0	0	0	96900	638000	209000	0	383000	0	991000	0	0	1470000	226000	21000	1810000	267000	0	1040000	0	0	1550000	0	0	1390000	0	0	0	0	1160000	0	0	0	1850000	0	849000	0	0	1070000
Immunoglobulin lambda variable 5-39	82500	836000	266000	685000	71400	478000	0	110000	307000	0	0	332000	328000	187000	0	361000	328000	0	279000	0	747000	86400	0	155000	360000	323000	0	240000	0	1300	676000	438000	215000	260000	0	181000	0	382000	94100	151000	0	35400	0	150000	117000	634000
Immunoglobulin lambda variable 5-45	82500	836000	266000	685000	71400	478000	0	110000	307000	0	0	332000	328000	187000	0	361000	328000	0	279000	0	747000	86400	0	155000	360000	323000	0	240000	0	1300	676000	438000	215000	260000	0	181000	0	382000	94100	151000	0	35400	0	150000	117000	634000
Immunoglobulin heavy variable 7-4-1	665000	125000	778000	485000	594000	568000	154000	203000	123000	164000	949000	239000	560000	303000	0	63000	0	0	124000	487000	407000	201000	262000	86400	205000	116000	301000	75600	134000	0	232000	70900	300000	190000	593000	171000	417000	557000	174000	462000	201000	321000	774000	288000	181000	127000
Kallistatin	27900000	12500000	37600000	15700000	34600000	28400000	14400000	33500000	14100000	25600000	31400000	23300000	26900000	28200000	18800000	10900000	18300000	28900000	44700000	38800000	18500000	31900000	32800000	19300000	18300000	16000000	34800000	25100000	24300000	16400000	37700000	6410000	27600000	21400000	15700000	13900000	19100000	34400000	34100000	33900000	39000000	43000000	13100000	28300000	32800000	17600000
Protein disulfide-isomerase	1510000	565000	1750000	1320000	2780000	1230000	1530000	1360000	1240000	1330000	0	780000	0	1030000	1970000	973000	836000	0	1230000	609000	927000	922000	2830000	703000	1360000	664000	3330000	521000	2550000	1510000	443000	0	794000	1140000	266000	805000	0	72700	1850000	967000	3600000	2940000	0	0	1430000	646000
Carboxypeptidase B2	11800000	10500000	16300000	9740000	9040000	7820000	11600000	17400000	15100000	10900000	4990000	9550000	13200000	20200000	4470000	6060000	9400000	15000000	10900000	11000000	11000000	10400000	12100000	10500000	12000000	11000000	16500000	13600000	15700000	12100000	16600000	6320000	21800000	8170000	5830000	8980000	5930000	10800000	21000000	14000000	17000000	16600000	9740000	13400000	14400000	10700000
Apolipoprotein C-I	538000000	357000000	566000000	440000000	773000000	472000000	445000000	401000000	193000000	571000000	582000000	528000000	514000000	354000000	444000000	308000000	408000000	477000000	397000000	725000000	457000000	251000000	447000000	521000000	467000000	483000000	741000000	368000000	670000000	291000000	534000000	335000000	401000000	385000000	705000000	456000000	616000000	616000000	553000000	509000000	611000000	520000000	389000000	744000000	603000000	538000000
Mannosyl-oligosaccharide 1 2-alpha-mannosidase IA	1430000	410000	33300	0	388000	170000	562000	1310000	426000	1190000	0	0	0	1570000	458000	270000	333000	983000	1840000	1110000	447000	493000	1070000	563000	1140000	534000	2120000	92800	847000	1910000	2270000	0	2000000	489000	330000	450000	390000	365000	362000	1430000	1520000	2100000	443000	39500	1470000	472000
Immunoglobulin kappa variable 1-5	8250000	9640000	10900000	9840000	8270000	11500000	3520000	9640000	9200000	7250000	17100000	4820000	13600000	7210000	6740000	7060000	6310000	4920000	8280000	9340000	9610000	7810000	12400000	6250000	16500000	8270000	8030000	3320000	3100000	3850000	8320000	12900000	3830000	5220000	6530000	6270000	4330000	13400000	4980000	5990000	7950000	4220000	7770000	9850000	5330000	7250000
Interleukin-1 receptor accessory protein	299000	0	200000	0	107000	91500	84100	468000	353000	467000	0	79700	113000	360000	3140	88600	0	613000	552000	95300	0	93500	125000	0	345000	76500	889000	719000	252000	305000	217000	113000	133000	0	337000	163000	106000	200000	226000	486000	55800	818000	148000	278000	582000	0
Hepatocyte growth factor-like protein	2870000	575000	1450000	1420000	2600000	2290000	1670000	3020000	728000	2160000	1610000	1320000	1510000	2680000	2370000	613000	2160000	2260000	2200000	2710000	2640000	227000	991000	1710000	651000	1930000	3990000	2490000	2620000	938000	3760000	867000	2040000	2720000	2090000	1890000	1980000	1060000	3280000	2910000	4860000	4680000	2930000	3840000	3450000	1570000
Immunoglobulin kappa variable 1-37 (non-functional) (Fragment)	7060000	8640000	6230000	9620000	6910000	9460000	1590000	7500000	5710000	5600000	2340000	4050000	1320000	5530000	10400000	5660000	3630000	5390000	7250000	2180000	7370000	5250000	4800000	3240000	6230000	6250000	4730000	3080000	5510000	9070000	5130000	6050000	4020000	6020000	4200000	6710000	1080000	7840000	8580000	5210000	5200000	8630000	2330000	5920000	5480000	6750000
Immunoglobulin heavy variable 3-43D	0	0	0	0	756000	537000	247000	0	83600	0	208000	0	0	0	1150000	131000	0	802000	333000	302000	868000	903000	382000	0	0	207000	0	0	0	0	0	412000	0	0	840000	519000	0	865000	423000	0	1240000	0	0	0	0	0
Cystatin-F	0	0	188000	0	1050000	0	0	0	0	0	1430000	234000	0	0	0	204000	1030000	0	0	581000	0	387000	377000	0	0	0	48100	0	687000	0	0	0	0	0	1550000	0	568000	529000	0	71800	0	0	3900	0	0	0
Protein CC2D2B	0	5120000	0	6630000	16500000	5050000	17300000	0	1760000	65500	18800000	5390000	15300000	68800	29700000	4810000	20900000	4940000	12000000	20400000	4910000	11300000	24400000	8060000	0	5700000	0	11800000	22200000	0	13700000	17800000	0	6350000	8560000	5360000	7540000	16000000	0	110000	14200000	0	14000000	4010000	0	8690000
Protein S100-A8	0	1090000	15400	490000	221000	88400	773000	877000	1010000	1270000	275000	1360000	459000	0	404000	7930000	8270000	124000	22700	88400	251000	3590000	813000	3430000	0	1350000	16000	30700	255000	3030000	0	123000	141000	134000	332000	3570000	2980000	725000	0	141000	0	332000	194000	70900	157000	631000
Glutathione peroxidase	309000	240000	264000	368000	1080000	272000	184000	80100	158000	311000	609000	406000	682000	343000	244000	1180000	869000	463000	172000	1300000	234000	833000	1030000	999000	416000	168000	157000	192000	1190000	832000	539000	594000	247000	106000	0	1370000	542000	545000	223000	120000	518000	622000	0	15300	343000	957000
Glutathione peroxidase 3	309000	240000	264000	368000	1080000	272000	184000	80100	158000	311000	609000	406000	682000	343000	244000	1180000	869000	463000	172000	1300000	234000	833000	1030000	999000	416000	168000	157000	192000	1190000	832000	539000	594000	247000	106000	0	1370000	542000	545000	223000	120000	518000	622000	0	15300	343000	957000
Retinoic acid receptor responder protein 2	356000	62600	0	0	92100	0	6500	258000	55800	0	0	0	0	0	0	0	0	0	595000	71500	0	51300	51900	145000	0	57300	0	530000	372000	645000	306000	0	1100000	155000	0	395000	0	0	801000	0	37600	0	9390	296000	0	19800
Serotransferrin	15600000000	10500000000	15300000000	9460000000	11000000000	10700000000	10700000000	16600000000	8560000000	11900000000	12100000000	8010000000	10600000000	13900000000	14000000000	6600000000	11000000000	13900000000	11100000000	7540000000	11400000000	4680000000	13000000000	10200000000	14000000000	8520000000	25500000000	8210000000	13200000000	7380000000	10200000000	8540000000	9370000000	8760000000	13700000000	8940000000	10500000000	10500000000	13200000000	14700000000	12900000000	15300000000	13900000000	13100000000	16500000000	8000000000
Serum paraoxonase/lactonase 3	600000	0	581000	0	0	0	103000	387000	0	10700	0	0	0	250000	0	0	0	281000	394000	129000	0	497000	372000	0	0	99800	0	601000	79800	0	825000	0	528000	0	373000	0	0	0	709000	388000	0	319000	0	571000	566000	0
Pericentriolar material 1 protein	210000	312000	91400	560000	1170000	1190000	718000	0	1070000	0	0	1140000	1250000	0	611000	557000	440000	469000	508000	1590000	2170000	1250000	1520000	813000	531000	617000	0	147000	930000	0	388000	608000	393000	1000000	1140000	1610000	1450000	1060000	571000	176000	1140000	235000	1180000	354000	759000	1050000
Immunoglobulin heavy variable 2-70 (Fragment)	4210000	0	1860000	0	7420000	1410000	0	2600000	0	3630000	0	0	846000	1330000	0	0	2470000	26800	3910000	129000	252000	2170000	267000	1090000	2670000	87900	0	1350000	0	2060000	7120000	0	1940000	0	124000	0	347000	1870000	1990000	5540000	197000	4640000	54900	2280000	98200	1560000
Immunoglobulin heavy constant gamma 4	35800000	85100000	129000000	152000000	122000000	80400000	188000000	19300000	37900000	98100000	189000000	39600000	130000000	147000000	118000000	109000000	172000000	58600000	88200000	112000000	77800000	171000000	655000000	44300000	40000000	127000000	32800000	16700000	41200000	12800000	101000000	34400000	37300000	59100000	56800000	78700000	94000000	177000000	78100000	58400000	205000000	75000000	175000000	78500000	10300000	104000000
Immunoglobulin kappa variable 1D-13	0	5350000	0	0	0	0	0	14800000	0	0	0	0	3920000	0	7060000	0	0	651000	0	115000	3110000	5580000	13800000	0	0	0	0	549000	0	1270000	2830000	14700000	0	3640000	320000	2360000	0	5970000	0	1200000	2910000	0	2830000	7420000	1090000	2210000
Immunoglobulin kappa variable 1-13	0	5350000	0	0	0	0	0	14800000	0	0	0	0	3920000	0	7060000	0	0	651000	0	115000	3110000	5580000	13800000	0	0	0	0	549000	0	1270000	2830000	14700000	0	3640000	320000	2360000	0	5970000	0	1200000	2910000	0	2830000	7420000	1090000	2210000
Mannan-binding lectin serine protease 2	2280000	1850000	1300000	983000	2320000	627000	997000	829000	2960000	2480000	62100	1110000	2150000	1970000	15100	400000	764000	2270000	1830000	1340000	846000	516000	2330000	1580000	2460000	2150000	5130000	4380000	2020000	4680000	2020000	1110000	3210000	1120000	265000	2380000	111000	2420000	4190000	3290000	1850000	4650000	1340000	1760000	3620000	1270000
GTPase-activating protein and VPS9 domain-containing protein 1	711000	5620000	1080000	7560000	3630000	14300000	2740000	671000	5160000	858000	17600000	1340000	14500000	1580000	1640000	6620000	11700000	3270000	481000	9840000	8950000	911000	3250000	7390000	960000	7600000	743000	0	2420000	313000	512000	11200000	391000	10100000	5490000	4570000	7360000	16800000	578000	493000	2820000	1170000	16000000	755000	488000	7370000
Complement C1r subcomponent-like protein	8510000	5000000	6660000	2820000	4810000	4690000	3730000	7980000	4560000	8840000	3100000	4750000	3520000	7470000	4270000	5190000	4030000	2640000	9240000	3840000	4900000	4170000	2210000	3800000	9280000	5700000	10400000	6240000	3660000	11900000	11400000	3790000	8780000	4860000	3920000	5460000	2030000	5840000	6250000	9910000	2790000	13700000	4170000	6180000	11000000	4620000
Apolipoprotein C-IV	5820000	7220000	7280000	11100000	8630000	8170000	12300000	15900000	8750000	17300000	12100000	12100000	24900000	8810000	8050000	19500000	10500000	27900000	4180000	39900000	59500000	13100000	3460000	26500000	8050000	18300000	10600000	14500000	15200000	4940000	18700000	4540000	10300000	17400000	21000000	13000000	23500000	10100000	13800000	26500000	35900000	17000000	26600000	38700000	31200000	21100000
Hornerin	0	766000	2480	347000	524000	375000	342000	192000	1160000	0	0	766000	375000	433000	0	612000	76900	69200	139000	0	95900	1500000	0	166000	0	93200	5210	270000	0	0	261000	190000	0	685000	0	277000	0	75000	243000	128000	2620	411000	0	124000	338000	466000
Thyroxine-binding globulin	45300000	44400000	57500000	31000000	40900000	50800000	36700000	64000000	53000000	50600000	15700000	38000000	29100000	51900000	20700000	38200000	41700000	49600000	52100000	15900000	39800000	23100000	27100000	40100000	54900000	25800000	44500000	49700000	27400000	58100000	49400000	24500000	52700000	57100000	13600000	47000000	17200000	28000000	53800000	54700000	37800000	56300000	14600000	42800000	66800000	45700000
Immunoglobulin lambda variable 8-61	7980000	7070000	22500000	52000000	12200000	8750000	1800000	10700000	22000000	9970000	13900000	8600000	9730000	7900000	15300000	25400000	15000000	19300000	19700000	1070000	21800000	14300000	45400000	8880000	11100000	34500000	7180000	6610000	7900000	12100000	23300000	10600000	13400000	12000000	11800000	3380000	6510000	5880000	7980000	14600000	6220000	6720000	6990000	11100000	14900000	15400000
Myosin-15	175000	2910000	622000	3490000	3190000	3250000	3250000	254000	4940000	138000	417000	4560000	3950000	232000	1560000	1070000	2170000	1730000	432000	1270000	2860000	2400000	4700000	1920000	83700	3760000	138000	40800	3140000	0	401000	3250000	138000	2510000	708000	791000	3150000	3720000	233000	227000	3630000	209000	3910000	416000	445000	1780000
Vascular endothelial growth factor receptor 3	443000	84100	354000	4690	219000	52400	131000	29700	276000	374000	0	61900	127000	88900	0	252000	134000	394000	57000	161000	11500	0	190000	40900	0	43500	520000	0	30000	108000	0	10800	0	92300	0	140000	0	106000	0	309000	83400	0	249000	0	0	114000
Immunoglobulin kappa variable 1-6	1010000	2410000	1250000	899000	812000	1250000	856000	1150000	1200000	1090000	2620000	1100000	1470000	1560000	1550000	439000	866000	1320000	688000	1310000	4320000	593000	1030000	1360000	3250000	1600000	991000	928000	1950000	2340000	2780000	190000	1870000	919000	1870000	1780000	2010000	1450000	1880000	1060000	1130000	1370000	859000	1430000	1620000	1040000
Cysteine-rich secretory protein 3	598000	4280000	5850000	570000	1030000	555000	2940000	1100000	2480000	1480000	0	2090000	1440000	769000	697000	1240000	2560000	23500	2830000	62200	4190000	462000	2520000	3090000	1750000	750000	1420000	5240000	1350000	2430000	7080000	1130000	1020000	3740000	2110000	2020000	579000	324000	577000	1790000	2400000	529000	2470000	7380000	2840000	1440000
Extracellular matrix protein 1	8380000	3950000	6450000	3140000	2360000	1270000	3240000	11000000	9240000	11600000	55500	1880000	1880000	5410000	4490000	2680000	1170000	5140000	8770000	3210000	3800000	1600000	2970000	1940000	9750000	2430000	9690000	5250000	3100000	9720000	4730000	2670000	2450000	5710000	2350000	1950000	3380000	1500000	12800000	5540000	4570000	5650000	5510000	3930000	11700000	2940000
Interferon-induced very large GTPase 1	0	339000	0	538000	1090000	528000	1000000	0	590000	0	1570000	1050000	1120000	0	990000	476000	1270000	835000	12000	1340000	594000	536000	1040000	788000	0	1320000	0	0	1240000	0	0	902000	0	1260000	1700000	582000	1240000	1200000	0	0	2640000	5490	1870000	72900	0	661000
Dermcidin	1080000	115000	143000	1510000	363000	51100	272000	220000	1460000	1460000	99100	883000	20400000	1050000	110000	0	22000000	200000	416000	0	5350000	444000	0	2090000	1570000	2770000	1650000	2140000	0	2390000	1490000	19000000	84200	0	78600	0	0	27400000	0	609000	133000	435000	108000	171000	0	1000000
Complement component C8 alpha chain	37700000	33200000	46700000	25700000	46600000	33900000	36900000	53500000	29000000	66600000	24700000	30300000	28300000	32400000	44000000	17100000	31100000	45400000	47300000	18300000	28700000	22600000	39800000	24100000	43100000	34400000	56900000	51300000	40300000	32400000	54100000	22100000	42900000	31400000	36200000	28100000	42200000	33000000	58200000	45500000	45000000	67900000	29400000	38600000	54400000	26400000
ITIH4 protein	10800000	5370000	9120000	3660000	5210000	0	4730000	6410000	4920000	6480000	1040000	763000	2480000	7560000	6690000	2500000	7390000	7370000	9670000	8270000	5190000	6320000	8590000	5040000	6800000	7230000	294000	8140000	9330000	11600000	11000000	6790000	13400000	4750000	1620000	6270000	249000	2050000	8350000	9110000	9160000	7530000	7180000	11800000	12300000	6050000
Immunoglobulin kappa variable 3D-11	104000000	122000000	104000000	109000000	104000000	106000000	77200000	61500000	51800000	62000000	192000000	57400000	144000000	70700000	130000000	54700000	78100000	111000000	62000000	106000000	109000000	73900000	204000000	71200000	115000000	104000000	50800000	37700000	75500000	79500000	64200000	131000000	54100000	82900000	120000000	53200000	131000000	99800000	63200000	68900000	118000000	76500000	117000000	158000000	83000000	68500000
Immunoglobulin kappa variable 3-11	104000000	122000000	104000000	109000000	104000000	106000000	77200000	61500000	51800000	62000000	192000000	57400000	144000000	70700000	130000000	54700000	78100000	111000000	62000000	106000000	109000000	73900000	204000000	71200000	115000000	104000000	50800000	37700000	75500000	79500000	64200000	131000000	54100000	82900000	120000000	53200000	131000000	99800000	63200000	68900000	118000000	76500000	117000000	158000000	83000000	68500000
Hemoglobin subunit delta	4680000	4280000	4310000	252000	473000	163000	1600000	3820000	2730000	8490000	109000	122000	553000	1810000	257000	731000	2070000	252000	3370000	8380000	1230000	3150000	916000	5080000	808000	4270000	1650000	467000	1220000	4710000	991000	2320000	4220000	1500000	1050000	2870000	759000	7470000	1250000	861000	562000	0	193000	766000	1750000	2780000
CD44 antigen	863000	501000	982000	566000	1750000	876000	104000	871000	853000	1120000	81300	904000	145000	1060000	148000	1070000	1410000	140000	1060000	790000	701000	775000	1490000	1270000	1460000	203000	0	488000	0	0	2440000	0	755000	774000	135000	572000	63200	1350000	859000	1130000	1920000	792000	125000	770000	1130000	678000
Immunoglobulin kappa variable 1D-16	2460000	1220000	709000	291000	707000	1330000	346000	616000	802000	944000	302000	263000	714000	1590000	949000	1200000	160000	216000	0	592000	1650000	258000	376000	0	3640000	464000	866000	493000	0	1240000	6520000	85700	893000	0	912000	730000	745000	0	2040000	511000	581000	777000	0	939000	1360000	649000
Immunoglobulin kappa variable 6-21	1990000	253000	1540000	6110000	1520000	1480000	1120000	2030000	2000000	1030000	8090000	764000	1570000	721000	1190000	1190000	1700000	2460000	1520000	958000	3680000	653000	2320000	1450000	1050000	1190000	537000	577000	3830000	1130000	3750000	2570000	482000	1320000	3740000	167000	2580000	919000	1820000	1620000	2420000	768000	952000	656000	1380000	692000
Cholinesterase	2700000	2710000	2180000	1780000	2900000	4510000	3810000	4680000	1940000	2940000	3670000	1600000	2370000	4610000	2360000	3040000	2450000	2220000	3660000	3900000	2060000	2600000	2250000	3760000	3050000	1180000	1880000	2480000	2110000	2060000	3830000	2110000	4340000	1760000	5030000	4360000	2680000	3360000	3020000	1490000	3380000	1740000	2530000	4210000	2110000	2250000
Sushi von Willebrand factor type A EGF and pentraxin domain-containing protein 1	1380000	11600	605000	90400	276000	524000	336000	1290000	2960000	725000	768000	63300	0	133000	0	81900	0	336000	323000	425000	4900	35000	326000	0	145000	0	4690000	88300	9970	278000	0	0	36400	381000	175000	71000	533000	258000	2340000	317000	138000	289000	2260000	78200	518000	0
Sperm equatorial segment protein 1	0	0	0	0	10200000	0	5620000	0	0	0	749000	0	12100000	0	3760000	0	7230000	3750000	0	2500000	0	5230000	7710000	0	0	0	63200	137000	9750000	0	0	9810000	0	0	10800000	0	6780000	11000000	0	0	8170000	0	5680000	167000	0	0
Immunoglobulin heavy constant mu	3120000000	1690000000	1060000000	1440000000	1620000000	917000000	1010000000	924000000	815000000	1190000000	1140000000	1030000000	1360000000	680000000	1140000000	1810000000	727000000	419000000	1240000000	1200000000	1240000000	1110000000	743000000	940000000	3590000000	792000000	944000000	1480000000	1320000000	768000000	2140000000	1390000000	1310000000	1560000000	1260000000	627000000	1500000000	857000000	1340000000	1490000000	2420000000	1060000000	684000000	525000000	1020000000	1520000000
Immunoglobulin heavy variable 5-51	5680000	4580000	8790000	5620000	6440000	4800000	5770000	4560000	6430000	3490000	8540000	1200000	4850000	7090000	3730000	2010000	1720000	4970000	3500000	7420000	9060000	5200000	7740000	4600000	8910000	3370000	2900000	2770000	5400000	2840000	6520000	5850000	3020000	3960000	5710000	3640000	5430000	3430000	5700000	5460000	7790000	5060000	7850000	10900000	6190000	3140000
Tropomyosin alpha-4 chain	0	0	161000	0	0	0	0	0	2120000	646000	0	0	0	568000	637000	1410000	0	0	0	0	0	0	0	0	0	0	0	0	0	0	0	0	0	0	0	0	0	0	30300	0	0	454000	0	0	0	0
Immunoglobulin heavy constant delta	10600000	12000000	688000	1140000	372000	2210000	2820000	66700000	19700000	193000000	9550000	4230000	12300000	42600000	3510000	4330000	1340000	2050000	19400000	12600000	46500000	21100000	3110000	12200000	16100000	24800000	11500000	17900000	89700	4070000	10800000	2320000	6760000	4300000	6450000	1510000	1770000	7320000	2510000	7180000	10100000	14900000	5340000	7910000	46600000	6410000
Beta-Ala-His dipeptidase	2360000	8340000	12200000	4960000	4610000	12300000	7800000	1130000	9870000	5470000	14500000	12100000	4950000	3030000	7670000	4210000	12900000	4560000	9900000	9110000	12100000	9440000	13700000	11200000	11800000	2400000	10400000	4950000	16600000	3840000	4990000	6780000	4720000	4430000	5530000	5940000	9070000	12300000	3640000	3400000	6370000	1600000	19600000	29500000	11900000	7900000
Putative heat shock protein HSP 90-alpha A5	356000	3630000	222000	2000000	1070000	0	1990000	859000	4590000	363000	0	0	0	0	0	296000	1360000	0	388000	0	2180000	2290000	0	1630000	242000	1680000	28300	0	0	411000	133000	1770000	0	1090000	0	1690000	0	0	777000	465000	0	0	0	0	811000	1020000
Pregnancy-specific beta-1-glycoprotein 3	1280000	16500	128000	165000	189000	211000	0	2560000	2130000	3440000	0	123000	0	343000	0	211000	37200	1010000	2720000	140000	129000	515000	117000	79300	541000	49600	1530000	660000	809000	0	409000	239000	711000	282000	471000	1450000	0	0	2930000	1540000	0	2050000	0	229000	1760000	175000
Uncharacterized protein (Fragment)	290000	46800	648000	414000	526000	664000	142000	0	1210000	78900	333000	175000	1130000	0	344000	587000	64700	32900	705000	936000	1920000	368000	4690000	31800	0	862000	451000	0	1120000	231000	778000	796000	287000	219000	15700	6760000	46200	126000	0	0	711000	214000	0	577000	568000	389000
Sulfhydryl oxidase 1	1800000	190000	1470000	570000	1510000	776000	377000	3370000	1250000	1840000	1180000	318000	0	3220000	401000	656000	125000	28500	2540000	499000	817000	808000	832000	521000	2150000	637000	2240000	2300000	1080000	1650000	1620000	167000	2100000	473000	219000	1200000	194000	824000	1490000	1790000	612000	1670000	300000	1100000	2570000	259000
Lipopolysaccharide-binding protein	1590000	3760000	817000	412000	2400000	782000	1340000	1030000	1880000	1630000	2460000	3400000	876000	2210000	1300000	3180000	2460000	2460000	1200000	602000	1360000	1400000	5570000	1700000	1870000	1950000	2070000	3380000	1630000	3240000	186000	259000	1370000	2250000	804000	4050000	645000	1850000	1230000	1050000	530000	4580000	225000	1250000	1430000	1170000
Apolipoprotein A-I	15400000000	3870000000	8250000000	4780000000	5930000000	3700000000	4110000000	9180000000	5040000000	17800000000	4160000000	4030000000	5800000000	13300000000	3090000000	4160000000	4110000000	6060000000	11100000000	8460000000	3780000000	6590000000	4110000000	6570000000	15700000000	4020000000	4810000000	11900000000	5220000000	6130000000	12800000000	3720000000	14700000000	3910000000	7110000000	5350000000	4100000000	3150000000	11000000000	13300000000	4090000000	9020000000	2950000000	9730000000	14600000000	7210000000
Coagulation factor XII	117000000	43800000	116000000	45500000	70700000	53700000	58200000	79000000	56700000	69500000	42600000	45600000	80400000	105000000	49600000	29700000	46600000	156000000	57800000	97800000	34600000	34600000	78700000	33800000	52300000	44800000	125000000	107000000	64500000	89500000	125000000	17500000	110000000	108000000	76000000	39300000	100000000	76500000	117000000	159000000	93600000	142000000	40200000	118000000	66300000	57900000
Serum albumin (Fragment)	0	1340000	216000	249000	612000	361000	799000	45600	0	0	1380000	813000	976000	0	771000	0	368000	1220000	0	466000	285000	0	386000	237000	0	322000	0	0	801000	0	0	474000	0	210000	2070000	0	1810000	506000	0	19700	436000	0	950000	0	0	133000
Immunoglobulin kappa variable 3D-15	3390000	2340000	2010000	3160000	2590000	5260000	2840000	3310000	1200000	1830000	103000	2330000	852000	1430000	2130000	2700000	1650000	1040000	1950000	5920000	3530000	2440000	2200000	1920000	4520000	3960000	1920000	957000	0	2280000	2140000	418000	855000	2600000	1090000	1870000	2790000	166000	1670000	3480000	416000	2030000	49200	1280000	1270000	1140000
Inter-alpha-trypsin inhibitor heavy chain H4	3230000	12600000	36600000	5450000	20600000	0	12700000	21900000	5070000	1900000	13700	551000	1870000	24700000	18600000	3970000	20500000	23000000	16900000	2820000	1350000	2150000	30800000	9580000	24500000	9800000	79700	17100000	25700000	3030000	36600000	23200000	25200000	10000000	594000	11200000	263000	0	24400000	34900000	36100000	4020000	15900000	38800000	35800000	14600000
Immunoglobulin heavy joining 2 (Fragment)	0	50400	0	34600	163000	258000	0	33700	234000	0	1460000	82000	94600	0	109000	0	456000	0	0	71000	32700	316000	358000	0	0	0	0	0	12500	0	79200	0	117000	0	0	257000	107000	195000	0	0	0	0	0	22700	142000	158000
Matrix metalloproteinase-9	0	7440	0	0	0	95000	6540	0	358000	635000	0	25700	0	0	0	662000	202000	0	0	0	0	0	0	11800	0	0	0	0	0	0	8730	0	0	0	0	0	0	28500	0	0	0	560000	0	0	0	0
Immunoglobulin heavy variable 1/OR15-1 (non-functional) (Fragment)	3780000	7330000	10800000	2610000	376000	1200000	1280000	3610000	14400000	4480000	198000	2040000	0	1400000	1090000	5970000	0	2160000	4510000	0	7980000	3680000	5850000	2890000	607000	11000000	7530000	2430000	5940000	2090000	172000	4240000	1680000	2420000	589000	5170000	0	0	2380000	726000	0	356000	10400000	692000	4230000	187000
Ectonucleoside triphosphate diphosphohydrolase 2	252000	2000000	398000	1890000	38700	1300000	90100	632000	1330000	0	2020000	1140000	1250000	545000	791000	970000	1950000	2240000	666000	3090000	2890000	410000	412000	2150000	354000	1820000	400000	451000	322000	556000	1120000	1540000	1120000	1560000	568000	348000	2850000	599000	885000	703000	6270000	462000	892000	625000	2840000	1630000
Coagulation factor XIII B chain	2470000	4770000	2410000	4340000	2420000	5410000	3770000	2830000	1200000	2570000	6280000	5260000	5020000	1670000	5280000	489000	4590000	4130000	4140000	3000000	5030000	1880000	2780000	3650000	2460000	4630000	5720000	1960000	6050000	1120000	3930000	4130000	2950000	6000000	7130000	1160000	4440000	5120000	2090000	5300000	5310000	5450000	3480000	4290000	2980000	3120000
Endothelial protein C receptor	523000	249000	371000	420000	43500	673000	2740000	373000	190000	920000	310000	844000	406000	304000	231000	84700	5090000	870000	795000	1580000	568000	142000	902000	317000	226000	336000	1140000	486000	702000	445000	367000	220000	214000	459000	2770000	180000	2710000	1630000	936000	720000	107000	689000	1940000	241000	606000	362000
BolA-like protein 2 (Fragment)	3580000	1800000	287000	2650000	2840000	725000	3700000	1980000	208000	3150000	4400000	1090000	2990000	3130000	4090000	700000	2220000	4360000	2980000	4560000	1760000	653000	5810000	2720000	2700000	2140000	422000	2830000	3880000	587000	3360000	1740000	4420000	1100000	3940000	805000	3300000	986000	2740000	2700000	6330000	1180000	2700000	3610000	3040000	2120000
BOLA2-SMG1P6 readthrough	3580000	1800000	287000	2650000	2840000	725000	3700000	1980000	208000	3150000	4400000	1090000	2990000	3130000	4090000	700000	2220000	4360000	2980000	4560000	1760000	653000	5810000	2720000	2700000	2140000	422000	2830000	3880000	587000	3360000	1740000	4420000	1100000	3940000	805000	3300000	986000	2740000	2700000	6330000	1180000	2700000	3610000	3040000	2120000
BolA-like protein 2	3580000	1800000	287000	2650000	2840000	725000	3700000	1980000	208000	3150000	4400000	1090000	2990000	3130000	4090000	700000	2220000	4360000	2980000	4560000	1760000	653000	5810000	2720000	2700000	2140000	422000	2830000	3880000	587000	3360000	1740000	4420000	1100000	3940000	805000	3300000	986000	2740000	2700000	6330000	1180000	2700000	3610000	3040000	2120000
Collectin-10	137000	0	66000	58100	1010000	117000	0	175000	113000	228000	0	627000	0	240000	35600	80800	106000	139000	315000	121000	118000	146000	299000	135000	320000	29400	745000	235000	0	371000	279000	0	249000	106000	16700	252000	464000	357000	506000	314000	501000	298000	0	38800	56600	47200
Immunoglobulin heavy variable 3-66	3660000	7920000	8730000	9950000	2460000	4120000	4100000	11100000	17100000	6720000	7500000	6090000	22600000	11600000	6220000	11900000	4480000	4950000	15100000	12200000	1870000	17700000	17700000	166000	16200000	7000000	4850000	6360000	8340000	14700000	7210000	8210000	3310000	9180000	40400000	17800000	3230000	30200000	12100000	7940000	7250000	13800000	8910000	5980000	14200000	11400000
Pappalysin-1	38500000	14600000	24600000	53600000	54500000	160000000	36300000	59800000	135000000	25900000	27600000	70800000	23800000	46900000	22500000	15000000	21500000	23200000	68800000	196000000	30900000	76900000	33300000	50200000	7710000	35800000	39300000	76200000	63800000	6780000	35200000	32300000	24500000	50100000	33600000	31700000	81500000	125000000	99800000	26400000	53200000	110000000	51700000	33200000	23400000	32300000
Immunoglobulin kappa variable 1/OR2-108 (non-functional) (Fragment)	17500000	29900000	23700000	29600000	27500000	28400000	24400000	24200000	7300000	16600000	56700000	17700000	45900000	17400000	43800000	22800000	27700000	28700000	20900000	31200000	34400000	15400000	55800000	20200000	26100000	28500000	12100000	10600000	23000000	13000000	22500000	35400000	11000000	23500000	42000000	17900000	35900000	34800000	13700000	18200000	37200000	12900000	35800000	29300000	16200000	20600000
T cell receptor alpha variable 38-1	119000	2230000	216000	1940000	0	1720000	2190000	0	1980000	0	3420000	2560000	4490000	0	5090000	1480000	4030000	3820000	332000	5370000	2780000	3430000	4320000	2420000	0	2320000	0	0	5070000	0	861000	926000	279000	1990000	7510000	1750000	7200000	4290000	0	0	0	0	6250000	1210000	0	2700000
T cell receptor alpha variable 38-2/delta variable 8	119000	2230000	216000	1940000	0	1720000	2190000	0	1980000	0	3420000	2560000	4490000	0	5090000	1480000	4030000	3820000	332000	5370000	2780000	3430000	4320000	2420000	0	2320000	0	0	5070000	0	861000	926000	279000	1990000	7510000	1750000	7200000	4290000	0	0	0	0	6250000	1210000	0	2700000
Phosphatidylinositol-glycan-specific phospholipase D	12900000	6900000	21100000	6490000	14000000	18700000	10700000	22100000	16100000	25600000	16800000	14500000	18600000	15200000	9680000	6010000	8730000	14500000	18300000	20700000	8330000	6930000	8230000	16000000	20200000	6340000	27100000	16400000	10500000	16700000	18800000	3900000	18100000	13500000	17000000	8560000	12000000	14500000	16800000	24400000	23000000	23800000	7800000	23100000	12800000	11000000
Peroxiredoxin-2	192000	859000	959000	286000	113000	161000	328000	42400	981000	588000	0	69800	0	41700	304000	112000	468000	81100	454000	300000	624000	1590000	0	1040000	0	628000	897000	63300	27500	325000	207000	118000	592000	338000	0	397000	31900	0	0	0	0	0	0	206000	158000	278000
Transmembrane protein 200B	4620000	2560000	2980000	3260000	3590000	3100000	4460000	2490000	2020000	3990000	344000	2980000	5700000	5680000	4510000	2790000	5000000	4770000	4460000	2660000	2790000	3630000	5070000	5620000	4340000	2610000	843000	5370000	5860000	1190000	5670000	4920000	5210000	3210000	4950000	2840000	1810000	3490000	3300000	4790000	4880000	2660000	2370000	4930000	5050000	4780000
Lysozyme C	752000	975000	750000	1030000	785000	615000	603000	1100000	760000	504000	48800	957000	651000	706000	630000	1560000	815000	338000	1500000	0	1000000	408000	233000	1940000	776000	1620000	1220000	464000	698000	1170000	1190000	576000	2130000	1480000	44000	461000	0	477000	1640000	1390000	169000	914000	0	887000	1270000	724000
Breast cancer anti-estrogen resistance protein 1	0	0	0	202000	93700	178000	0	0	0	0	0	0	0	0	0	0	353000	0	212000	0	0	2310	0	169000	0	0	0	0	0	0	0	0	0	0	0	0	0	0	0	0	0	0	0	277000	341000	0
Proteoglycan 4	14100000	2430000	8730000	2510000	2050000	13000000	2730000	9660000	2040000	342000	1560000	3020000	3160000	296000	3110000	1130000	3070000	2510000	2120000	2310000	2860000	1140000	2260000	3060000	11300000	1880000	944000	868000	2820000	8320000	1970000	1790000	1590000	2360000	5180000	2770000	2710000	2000000	14800000	16900000	4440000	33900000	2670000	2980000	13500000	1170000
Immunoglobulin kappa variable 1-12	1910000	3880000	1640000	1790000	224000	3800000	626000	1470000	684000	782000	4970000	1360000	3120000	1100000	766000	264000	1270000	144000	1100000	520000	1540000	1370000	301000	1050000	4790000	1260000	1730000	626000	71900	912000	2060000	2530000	979000	477000	2250000	178000	2330000	1800000	736000	1040000	1320000	1430000	2770000	2030000	1240000	977000
Immunoglobulin kappa variable 1D-12	1910000	3880000	1640000	1790000	224000	3800000	626000	1470000	684000	782000	4970000	1360000	3120000	1100000	766000	264000	1270000	144000	1100000	520000	1540000	1370000	301000	1050000	4790000	1260000	1730000	626000	71900	912000	2060000	2530000	979000	477000	2250000	178000	2330000	1800000	736000	1040000	1320000	1430000	2770000	2030000	1240000	977000
Plasminogen	189000000	297000000	240000000	225000000	382000000	297000000	292000000	201000000	162000000	205000000	243000000	294000000	382000000	219000000	370000000	204000000	308000000	374000000	228000000	449000000	364000000	232000000	346000000	291000000	259000000	269000000	278000000	198000000	376000000	162000000	221000000	230000000	252000000	281000000	464000000	298000000	488000000	317000000	191000000	275000000	436000000	233000000	426000000	320000000	261000000	274000000
Thrombospondin-1	1320000	2180000	1750000	1390000	6070000	10000000	1990000	4620000	22600000	21300000	8470000	7180000	5140000	2860000	271000	9030000	3320000	3740000	3020000	3260000	846000	7000000	1990000	6920000	1750000	610000	18000000	4250000	1250000	0	11100000	1730000	3090000	1370000	11000000	337000	11500000	7550000	291000	1980000	1690000	35400000	4690000	1290000	1650000	1810000
Prenylcysteine oxidase 1	114000	1900000	1270000	1910000	2510000	2430000	1290000	147000	1340000	361000	3080000	2990000	2840000	0	3960000	736000	1010000	3650000	316000	2430000	2950000	4630000	650000	2080000	172000	1350000	463000	177000	894000	0	467000	1110000	81200	2270000	4600000	1500000	4290000	3740000	224000	888000	5570000	469000	3430000	1140000	258000	2600000
Immunoglobulin lambda variable 2-11	9000000	754000	839000	5020000	154000	4980000	4190000	54400	33300000	400000	9350000	143000	30100	6480000	4300000	2760000	3360000	7510000	504000	76900	294000	3020000	6060000	3040000	1520000	4120000	6490000	3950000	4770000	324000	10400000	5320000	6400000	4020000	250000	479000	7120000	145000	7900000	7790000	96900000	2880000	7260000	155000	10500000	1630000
Immunoglobulin heavy variable 1-58	0	380000	208000	556000	161000	778000	177000	139000	96300	35600	0	77500	507000	28600	0	97100	167000	0	214000	0	426000	138000	0	33300	60000	227000	155000	0	0	656000	361000	129000	22900	162000	0	72000	0	191000	314000	159000	0	108000	0	76500	81600	66400
Complement C1q subcomponent subunit A	21700000	11300000	23000000	11500000	16900000	16400000	10000000	23100000	21800000	2320000	17000000	13000000	13300000	24800000	11400000	12600000	11700000	14800000	26200000	11900000	13700000	11800000	22500000	9460000	18300000	19800000	2910000	21700000	15500000	2330000	30600000	5350000	28200000	16800000	14500000	14200000	15400000	20500000	19700000	18600000	23000000	41900000	14600000	24000000	27700000	12900000
Immunoglobulin lambda constant 3	358000000	300000000	307000000	354000000	229000000	254000000	217000000	524000000	197000000	352000000	6740000	106000000	246000000	371000000	334000000	137000000	143000000	246000000	308000000	17200000	390000000	129000000	115000000	162000000	518000000	238000000	516000000	176000000	315000000	330000000	579000000	377000000	230000000	225000000	24400000	258000000	5720000	268000000	449000000	361000000	48200000	358000000	5740000	409000000	478000000	158000000
Immunoglobulin lambda constant 2	358000000	300000000	307000000	354000000	229000000	254000000	217000000	524000000	197000000	352000000	6740000	106000000	246000000	371000000	334000000	137000000	143000000	246000000	308000000	17200000	390000000	129000000	115000000	162000000	518000000	238000000	516000000	176000000	315000000	330000000	579000000	377000000	230000000	225000000	24400000	258000000	5720000	268000000	449000000	361000000	48200000	358000000	5740000	409000000	478000000	158000000
Immunoglobulin kappa joining 1	2180000	5080000	7630000	3920000	3420000	5720000	1090000	1650000	731000	1190000	8450000	973000	4620000	658000	4890000	1000000	1080000	4820000	5420000	5300000	7800000	2300000	10300000	3310000	2730000	4160000	1140000	567000	2190000	68000	7380000	4270000	1390000	2310000	5200000	1790000	4140000	3310000	1730000	2880000	7280000	4910000	4900000	7900000	1540000	1460000
Immunoglobulin heavy variable 5-10-1	1200000	0	2470000	2140000	7650000	5040000	4110000	1930000	198000	1510000	0	1680000	1990000	2390000	0	0	0	549000	0	2970000	5480000	2660000	425000	0	0	4110000	331000	0	1070000	1040000	0	0	450000	0	692000	0	2500000	2480000	0	347000	2910000	3410000	0	2100000	677000	5100000
Insulin-like growth factor-binding protein 3	12900000	6210000	8640000	9660000	4270000	12200000	6530000	13800000	14500000	9720000	2350000	5860000	6970000	16800000	9080000	4950000	3700000	15900000	11600000	4810000	11900000	5580000	4610000	5960000	7590000	6140000	10300000	20300000	9980000	3010000	15100000	6620000	16900000	8200000	4910000	5530000	6030000	12200000	29700000	21300000	9950000	8340000	11000000	11200000	32000000	7180000
Mannan-binding lectin serine protease 1	1670000	971000	1420000	1490000	192000	2360000	1330000	1770000	2520000	954000	388000	1520000	753000	944000	2710000	1570000	897000	1450000	1260000	620000	2990000	1090000	543000	3430000	1110000	2310000	1440000	3030000	1730000	272000	1280000	2080000	2410000	3120000	58800	2540000	427000	2340000	2680000	3030000	725000	2610000	216000	2870000	2190000	3000000
Trypsin-1	2280000	0	459000	50900	0	370000	0	1430000	0	1480000	0	0	0	303000	0	0	0	0	144000	0	161000	198000	0	0	1990000	0	0	0	0	12800	0	0	0	519000	68200	1050000	0	0	3240000	2190000	0	0	0	0	0	0
Putative trypsin-6	2280000	0	459000	50900	0	370000	0	1430000	0	1480000	0	0	0	303000	0	0	0	0	144000	0	161000	198000	0	0	1990000	0	0	0	0	12800	0	0	0	519000	68200	1050000	0	0	3240000	2190000	0	0	0	0	0	0
Trypsin-2	2280000	0	459000	50900	0	370000	0	1430000	0	1480000	0	0	0	303000	0	0	0	0	144000	0	161000	198000	0	0	1990000	0	0	0	0	12800	0	0	0	519000	68200	1050000	0	0	3240000	2190000	0	0	0	0	0	0
Complement factor H	1630000	3780000	0	1860000	0	1990000	176000	2610000	2180000	2070000	2710000	2710000	2260000	2700000	0	1390000	1230000	0	1580000	3910000	1580000	848000	1070000	1910000	2570000	3610000	1640000	2030000	0	0	3240000	1320000	3980000	2850000	1500000	1460000	0	0	1860000	4110000	0	920000	3100000	4810000	1160000	1750000
Amiloride-sensitive amine oxidase [copper-containing]	0	39500	650000	395000	370000	1030000	2140000	543000	724000	216000	634000	580000	383000	502000	3280000	123000	1210000	224000	458000	2080000	575000	736000	1490000	356000	15300	453000	1080000	381000	403000	108000	486000	809000	807000	430000	125000	37200	374000	968000	0	0	0	1000000	531000	572000	0	250000
Pregnancy-specific beta-1-glycoprotein 6	851000	199000	1010000	377000	107000	518000	70600	4200000	3240000	11600000	3220000	130000	23100	2240000	72300	469000	0	76600	2450000	539000	144000	0	162000	76500	345000	0	4240000	5130000	224000	2290000	1560000	0	1130000	227000	0	0	258000	192000	3880000	885000	237000	2190000	156000	633000	394000	0
Exportin-5	200000	182000	650000	200000	111000	55400	445000	298000	280000	0	385000	279000	28600	76700	0	134000	148000	30000	20100	390000	267000	0	605000	356000	440000	43900	631000	360000	172000	1040000	77800	242000	62900	359000	324000	220000	23200	492000	29700	0	563000	310000	110000	138000	25200	471000
Immunoglobulin heavy variable 3-49	2370000	1270000	1450000	1290000	4170000	1230000	97500	353000	2610000	807000	99900	616000	3950000	1280000	53400	3500000	1070000	0	1030000	416000	795000	2150000	461000	411000	1980000	461000	1430000	178000	2530000	644000	2290000	293000	1350000	355000	0	2720000	577000	83200	1570000	908000	519000	1450000	0	470000	1270000	1920000
Vitamin K-dependent protein Z	8130000	947000	2900000	111000	3580000	1210000	383000	6610000	2870000	3950000	993000	579000	2220000	5350000	152000	2560000	1590000	3910000	1970000	1060000	557000	1260000	1880000	1330000	6830000	113000	5910000	5740000	5460000	1870000	3840000	4540000	4480000	452000	787000	1120000	163000	1480000	1460000	7240000	457000	9790000	342000	2850000	10000000	1370000
Insulin-like growth factor-binding protein complex acid labile subunit	42400000	14300000	37200000	23600000	25700000	44400000	27600000	52800000	26900000	45100000	22700000	39500000	35500000	42300000	14400000	28800000	22600000	55300000	40800000	28700000	24900000	34600000	22100000	21100000	29400000	15200000	47900000	37600000	47100000	11200000	33900000	20500000	39100000	29000000	37400000	18100000	45900000	33900000	71300000	53300000	38600000	33100000	40300000	26800000	56600000	16900000
Hemoglobin subunit beta	481000000	471000000	506000000	258000000	170000000	72800000	292000000	383000000	439000000	683000000	39600000	117000000	58500000	258000000	175000000	288000000	481000000	57500000	372000000	1020000000	331000000	496000000	131000000	935000000	130000000	649000000	187000000	106000000	180000000	388000000	169000000	201000000	487000000	475000000	27900000	325000000	174000000	20900000	154000000	149000000	229000000	62900000	116000000	164000000	203000000	464000000
Immunoglobulin heavy variable 6-1	25800000	51600000	1220000	31400000	34400000	14300000	18800000	38500000	30000000	36600000	45500000	55800000	28500000	20000000	62700000	30900000	37700000	23200000	31200000	46800000	91600000	38700000	96200000	14200000	28800000	65500000	17400000	7850000	11100000	32900000	30300000	5400000	14500000	24600000	45000000	58300000	16500000	16200000	18100000	18500000	28900000	21500000	35900000	7690000	11900000	22000000
Complement component C8 gamma chain	1850000	4290000	1760000	3670000	4030000	6920000	1520000	2600000	4820000	1660000	3350000	4940000	4040000	1720000	2200000	3290000	2800000	3540000	2600000	5050000	3570000	3680000	4060000	4030000	3190000	4970000	3940000	3100000	3950000	3030000	1470000	2680000	1670000	4300000	4080000	4840000	3850000	6430000	3160000	2740000	2330000	3770000	6530000	1050000	3400000	3760000
Complement component C7	41000000	12200000	27000000	28600000	24000000	36000000	24600000	23600000	19500000	33600000	26000000	26500000	16600000	17000000	27700000	28800000	19700000	29200000	7590000	19000000	34900000	17700000	44500000	32700000	23600000	30600000	39100000	19500000	38500000	23800000	30700000	17200000	24300000	49900000	28400000	20900000	36800000	27100000	29900000	24800000	28700000	18400000	25100000	20100000	24900000	26300000
Platelet glycoprotein Ib alpha chain	315000	171000	345000	416000	577000	1090000	222000	628000	580000	604000	0	338000	678000	218000	110000	711000	0	222000	279000	616000	389000	103000	303000	490000	655000	173000	1190000	269000	225000	494000	462000	0	309000	348000	85700	543000	197000	479000	406000	496000	150000	2120000	106000	223000	781000	369000
Immunoglobulin J chain	53700000	43600000	39300000	23200000	28100000	23600000	19900000	21900000	26500000	23400000	22600000	17300000	29600000	17300000	51900000	23600000	8010000	7240000	32000000	27400000	32700000	22500000	12400000	15000000	94000000	19700000	23800000	31700000	23300000	16800000	63000000	37800000	36200000	23700000	25500000	14100000	29700000	51700000	52400000	39100000	42800000	31800000	18800000	12500000	29500000	26600000
Selenoprotein P	914000	2680000	2300000	1640000	1220000	2580000	1590000	1060000	917000	1600000	2750000	2220000	1580000	1500000	1530000	1000000	1820000	1630000	1420000	2400000	2060000	1010000	2500000	2540000	1220000	1880000	598000	685000	3300000	1940000	1790000	3260000	1610000	1550000	4340000	591000	2770000	2330000	1640000	1410000	3010000	756000	1810000	1040000	1300000	3300000
cDNA FLJ55673 highly similar to Complement factor B	596000000	525000000	522000000	448000000	500000000	367000000	351000000	749000000	537000000	541000000	314000000	548000000	379000000	691000000	664000000	592000000	369000000	433000000	571000000	307000000	302000000	220000000	496000000	367000000	670000000	877000000	1110000000	853000000	431000000	1160000000	489000000	346000000	800000000	495000000	314000000	539000000	244000000	318000000	631000000	629000000	596000000	1030000000	254000000	682000000	724000000	502000000
SPARC	0	137000	0	0	0	894000	0	303000	1420000	2460000	1240000	827000	0	0	222000	700000	467000	0	0	618000	117000	793000	0	697000	0	0	4330000	0	0	0	622000	26600	0	0	2170000	0	1470000	2030000	0	0	0	4670000	0	0	0	0
Gelsolin	198000000	86800000	204000000	112000000	85100000	112000000	77100000	152000000	200000000	177000000	70800000	107000000	85100000	193000000	80300000	74500000	69100000	103000000	166000000	55200000	97800000	94900000	83100000	75600000	182000000	124000000	109000000	101000000	77200000	114000000	181000000	101000000	105000000	114000000	68600000	87200000	69900000	111000000	138000000	126000000	73500000	116000000	57400000	119000000	180000000	84500000
Immunoglobulin kappa variable 1D-39	128000	166000	54500	118000	274000	0	240000	196000	78700	19000	160000	81500	393000	1030000	373000	0	137000	474000	212000	329000	123000	372000	183000	188000	0	426000	0	571000	211000	396000	363000	136000	139000	163000	500000	140000	279000	139000	32700	132000	139000	0	120000	71600	103000	170000
Immunoglobulin kappa variable 1-39	128000	166000	54500	118000	274000	0	240000	196000	78700	19000	160000	81500	393000	1030000	373000	0	137000	474000	212000	329000	123000	372000	183000	188000	0	426000	0	571000	211000	396000	363000	136000	139000	163000	500000	140000	279000	139000	32700	132000	139000	0	120000	71600	103000	170000
Fibrinogen alpha chain	10000000000	13400000000	10700000000	9020000000	7600000000	77700000	8980000000	17400000000	10500000000	11600000000	102000000	118000000	192000000	6780000000	9920000000	4180000000	9750000000	6450000000	15800000000	8920000000	11700000000	8800000000	7020000000	10300000000	9100000000	10300000000	95800000	9110000000	9430000000	17300000000	11600000000	9610000000	18700000000	9670000000	142000000	10600000000	56400000	114000000	17300000000	17000000000	10200000000	378000000	8050000000	17500000000	15900000000	9730000000
F-box only protein 41	0	133000	23700	450000	431000	0	1530000	0	0	383000	241000	212000	0	645000	858000	278000	707000	277000	190000	0	268000	446000	63300	894000	0	0	0	327000	950000	0	229000	501000	0	325000	1060000	99800	1020000	196000	0	316000	1620000	0	0	302000	361000	612000
Beta-2-glycoprotein 1	176000000	129000000	97800000	88400000	200000000	136000000	126000000	183000000	83700000	175000000	55600000	46500000	127000000	171000000	130000000	46400000	109000000	170000000	112000000	80600000	154000000	75200000	113000000	152000000	145000000	155000000	91200000	111000000	97200000	115000000	152000000	64700000	190000000	113000000	119000000	37500000	107000000	134000000	153000000	271000000	138000000	149000000	133000000	164000000	196000000	114000000
Corticosteroid-binding globulin	104000000	79300000	136000000	52300000	60100000	69200000	72800000	128000000	101000000	83500000	51100000	63300000	67900000	43800000	54000000	62200000	103000000	91400000	77200000	136000000	103000000	33600000	73300000	45300000	65300000	67800000	102000000	99400000	57900000	52700000	41700000	26300000	66200000	81600000	64900000	96500000	58100000	72900000	103000000	122000000	28700000	102000000	74700000	160000000	87300000	65000000
CD5 antigen-like	16500000	22700000	10300000	13600000	18100000	11300000	14700000	5890000	6430000	8390000	18300000	13700000	20900000	3760000	21400000	20100000	5050000	6490000	8220000	13000000	13900000	8560000	9380000	11300000	22100000	11900000	5900000	7960000	15900000	5110000	15100000	19800000	7070000	18100000	19800000	7550000	21100000	13700000	9040000	9800000	29000000	6630000	10700000	2880000	4740000	17300000
Antithrombin-III	897000000	473000000	924000000	426000000	772000000	316000000	500000000	1200000000	564000000	870000000	171000000	320000000	228000000	906000000	659000000	469000000	591000000	764000000	821000000	594000000	575000000	431000000	565000000	537000000	782000000	594000000	824000000	838000000	707000000	1230000000	870000000	548000000	979000000	598000000	248000000	417000000	93000000	228000000	726000000	1270000000	789000000	572000000	401000000	935000000	807000000	469000000
Immunoglobulin lambda variable 2-8	2130000	6620000	1090000	3160000	1940000	2560000	3290000	212000	3770000	606000	1230000	4600000	4070000	565000	6370000	1840000	1070000	2060000	0	1090000	4710000	1060000	2710000	2800000	4740000	4070000	910000	0	4250000	1270000	2200000	5790000	216000	2100000	4870000	1600000	3940000	2030000	763000	3880000	1320000	988000	1840000	1520000	899000	3690000
Alpha-1-antitrypsin	740000000	1560000000	125000000	500000000	978000000	1210000000	1090000000	1770000000	1150000000	768000000	1720000000	1100000000	996000000	1940000000	489000000	1150000000	366000000	526000000	938000000	943000000	897000000	447000000	1180000000	1160000000	955000000	1540000000	2500000000	1170000000	1380000000	1840000000	1910000000	852000000	823000000	1430000000	1250000000	811000000	1410000000	1250000000	2570000000	753000000	547000000	3590000000	1540000000	59900000	2110000000	1270000000
Immunoglobulin kappa variable 1-33	24000000	14400000	22600000	14900000	22800000	13100000	7450000	15100000	13300000	24700000	11700000	8490000	22200000	18600000	7590000	10300000	4420000	15400000	17800000	16600000	9620000	11800000	13400000	9580000	29900000	15100000	25200000	11400000	13500000	29800000	14400000	7660000	8660000	5910000	34900000	13000000	10500000	12300000	15500000	21700000	12100000	37800000	10400000	14400000	17200000	8000000
Immunoglobulin kappa variable 1D-33	24000000	14400000	22600000	14900000	22800000	13100000	7450000	15100000	13300000	24700000	11700000	8490000	22200000	18600000	7590000	10300000	4420000	15400000	17800000	16600000	9620000	11800000	13400000	9580000	29900000	15100000	25200000	11400000	13500000	29800000	14400000	7660000	8660000	5910000	34900000	13000000	10500000	12300000	15500000	21700000	12100000	37800000	10400000	14400000	17200000	8000000
Protein Z-dependent protease inhibitor	3990000	3420000	2940000	2940000	5460000	4500000	3610000	5610000	5480000	2350000	6390000	6990000	5850000	4830000	1400000	7530000	6950000	5150000	3090000	7010000	4660000	2280000	6700000	5380000	5160000	6100000	4510000	6980000	5970000	2130000	5480000	3330000	5040000	3530000	3960000	2960000	4460000	5310000	2100000	3490000	4700000	6170000	4900000	1600000	6090000	3630000
Complement component C8 beta chain	11200000	17700000	10600000	10800000	28700000	18900000	13900000	11400000	7160000	9500000	9200000	21100000	14400000	7390000	25100000	8460000	13100000	37700000	15400000	9010000	19200000	5820000	18400000	18300000	10600000	27800000	20100000	14800000	24200000	9220000	21200000	11900000	8280000	19800000	21800000	10300000	14100000	21800000	18800000	14000000	16500000	15800000	12600000	13600000	13000000	18900000
Fibulin-1	19800000	7720000	14400000	767000	2580000	10700000	21400000	8670000	4850000	9850000	1110000	1260000	6000000	6350000	8920000	11100000	2510000	12000000	13000000	1270000	14100000	4040000	11200000	9800000	10300000	2410000	28300000	6800000	3630000	1650000	14100000	3370000	3830000	20700000	665000	7770000	607000	1410000	15200000	4940000	1290000	8720000	3550000	7240000	12500000	10500000
Immunoglobulin heavy variable 4-4	0	311000	463000	388000	678000	1000000	546000	521000	806000	25100	0	0	322000	227000	88900	372000	950000	323000	0	0	1100000	868000	95100	316000	0	0	12900	0	497000	0	0	960000	830000	0	105000	836000	0	564000	674000	765000	0	0	0	195000	679000	1180000
Coagulation factor IX	1960000	2600000	2190000	4140000	3620000	796000	3100000	7610000	4230000	2040000	171000	748000	1180000	6460000	3600000	13400000	3010000	7060000	6230000	2980000	2070000	1140000	830000	4410000	1680000	4940000	753000	3150000	2870000	9440000	7560000	1320000	1110000	4860000	5640000	12500000	1050000	1530000	6850000	2390000	3470000	8540000	5220000	1280000	5110000	3520000
Mannose-binding protein C	1340000	2850000	0	1410000	0	700000	0	4590000	363000	2410000	216000	3310000	30500	160000	401000	196000	265000	0	875000	259000	4940000	0	31400	3840000	1120000	1440000	4930000	150000	2170000	421000	21200	1540000	1010000	3220000	0	1990000	6370	3210000	2440000	3360000	375000	2280000	6660000	11800	155000	314000
Pregnancy zone protein	555000000	577000000	144000000	78500000	807000000	176000000	350000000	453000000	536000000	933000000	215000000	1040000000	285000000	581000000	221000000	384000000	441000000	195000000	248000000	387000000	124000000	85900000	942000000	35900000	748000000	551000000	92200000	406000000	103000000	167000000	282000000	169000000	165000000	542000000	93300000	906000000	1090000000	1150000000	458000000	353000000	775000000	262000000	160000000	82600000	265000000	327000000
Immunoglobulin heavy variable 3-15	6550000	4650000	2840000	10700000	3930000	3530000	6130000	1770000	3460000	3380000	15500	2070000	10800000	4130000	3930000	2810000	619000	3210000	4100000	224000	4480000	999000	108000	6330000	8500000	3380000	3510000	1210000	1470000	3250000	11000000	5140000	4160000	3240000	326000	3000000	626000	2200000	3050000	8390000	256000	3260000	3010	6200000	3600000	3690000
Immunoglobulin lambda variable 7-43	0	212000	0	775000	194000	0	22700	0	0	0	0	0	568000	0	0	0	0	0	0	0	291000	430000	0	212000	0	0	0	0	458000	0	171000	260000	0	0	0	0	0	115000	0	0	0	0	0	0	0	413000
Disintegrin and metalloproteinase domain-containing protein 12	6280000	4140000	4640000	5860000	3680000	3600000	5760000	7900000	7250000	5310000	5970000	2320000	2960000	2940000	4660000	1860000	2070000	5560000	5040000	6250000	3020000	896000	3490000	4130000	2510000	3490000	10100000	2450000	3800000	3200000	4230000	1500000	1980000	3280000	5060000	1590000	5660000	5070000	10500000	3290000	5590000	4490000	15000000	7920000	5750000	2170000
Vitamin D-binding protein	1200000000	1210000000	1670000000	899000000	1200000000	1160000000	1260000000	1260000000	855000000	1480000000	1280000000	1040000000	1490000000	1150000000	941000000	889000000	845000000	2040000000	1080000000	1400000000	937000000	366000000	1340000000	661000000	1110000000	1200000000	1240000000	1720000000	1350000000	763000000	1170000000	1030000000	1250000000	1120000000	2150000000	859000000	1550000000	939000000	1200000000	1650000000	2030000000	1810000000	1440000000	1710000000	1270000000	1100000000
MAP/microtubule affinity-regulating kinase 3	767000	860000	1530000	1040000	513000	1070000	3260000	1030000	1260000	235000	492	4640000	319000	2010000	1330000	553000	702000	1020000	1550000	164000	540000	676000	0	917000	1140000	1110000	1180000	1330000	34000	531000	419000	724000	253000	1640000	0	662000	27700	1290000	797000	844000	0	603000	135000	1920000	451000	679000
Nck-associated protein 1	376000	0	0	10200	50300	0	0	230000	174000	259000	0	0	0	0	0	0	0	0	361000	293000	0	313000	0	70400	0	0	0	0	0	531000	0	0	0	62000	0	38100	0	0	218000	41400	110000	0	0	0	0	0
Immunoglobulin kappa variable 3D-20	22400000	24000000	32000000	31200000	26300000	25400000	20300000	14900000	17100000	14400000	60200000	13800000	47300000	896000	36300000	13700000	18600000	24400000	19800000	31400000	27100000	19000000	66500000	13800000	27100000	20800000	21300000	11700000	18400000	17800000	25300000	30700000	13300000	17400000	25100000	15200000	23500000	20500000	14600000	14900000	27900000	18500000	31600000	29400000	22500000	14800000
Immunoglobulin lambda variable 9-49	0	395000	0	575000	666000	268000	616000	0	1750000	263000	501000	0	1020000	112000	611000	111000	683000	130000	315000	249000	988000	1890000	475000	0	0	0	0	105000	0	0	0	1350000	0	1570000	0	3110000	751000	0	11500	0	389000	0	0	0	0	0
Immunoglobulin lambda variable 3-19	3620000	5320000	1920000	4160000	2670000	5500000	3340000	5770000	2300000	5560000	1650000	1520000	999000	2830000	3750000	3600000	1480000	6980000	4920000	1730000	8030000	2530000	853000	2710000	15800000	5700000	5250000	2500000	3820000	3610000	3290000	11700000	3810000	3030000	5750000	4450000	1490000	1220000	9070000	11000000	767000	9010000	1080000	3820000	6210000	1510000
Bone marrow proteoglycan	6170000	6820000	7420000	13500000	8250000	32000000	6930000	8490000	28500000	4260000	8260000	20400000	16100000	13600000	6840000	8750000	6970000	3360000	5030000	44900000	6330000	21300000	9840000	13600000	2500000	10700000	7070000	8880000	22600000	6520000	10500000	17600000	6560000	16000000	3180000	10300000	18600000	19900000	9690000	7750000	14600000	23100000	8750000	4530000	3390000	10000000
Immunoglobulin lambda variable 1-36	0	145000	845000	550000	0	311000	221000	0	395000	661000	2640000	247000	0	835000	0	0	0	502000	834000	1250000	0	0	617000	69400	966000	147000	334000	0	2600000	269000	1260000	217000	0	0	451000	0	272000	242000	0	38800	409000	1780000	278000	685000	893000	0
Peptidase inhibitor 16	350000	0	270000	25000	118000	159000	0	315000	208000	0	0	275000	0	200000	6210	0	0	0	277000	57600	40900	48800	0	0	471000	84700	0	0	0	0	415000	0	375000	224000	0	0	37400	5740	455000	0	118000	201000	17000	80300	362000	73800
Immunoglobulin lambda variable 6-57	3990000	7840000	22700000	7240000	8110000	14700000	5100000	5690000	21300000	6530000	17200000	4640000	8670000	6440000	4660000	2730000	3800000	5030000	6230000	13500000	19900000	4970000	3180000	2000000	20600000	4190000	5740000	3450000	8300000	2340000	16200000	4360000	4920000	4700000	9410000	8480000	7750000	11700000	8730000	9530000	8280000	7010000	14400000	35400000	12700000	4350000
Thrombospondin-4	330000	114000	222000	569000	103000	133000	155000	201000	533000	502000	106000	587000	182000	186000	235000	298000	62600	297000	474000	0	112000	107000	0	159000	706000	685000	35200	433000	185000	0	696000	235000	145000	666000	0	187000	68600	240000	721000	117000	451000	214000	44700	306000	641000	213000
Fetuin-B	18500000	7250000	13200000	9880000	8930000	5220000	8040000	13700000	15900000	19200000	8240000	10100000	9870000	12600000	1020000	12100000	6340000	8360000	7090000	2430000	1720000	2760000	6760000	6570000	23700000	5360000	34000000	20200000	4430000	19200000	8950000	8800000	13900000	8300000	6910000	7660000	7990000	7120000	7890000	43000000	1400000	12800000	7800000	17500000	26100000	10200000
Biotinidase	2200000	2540000	8080000	4940000	7650000	7030000	5830000	5070000	2610000	1900000	3920000	6330000	6120000	4950000	5060000	3870000	3410000	8740000	1800000	9130000	5440000	3450000	5190000	5380000	2760000	6240000	5580000	3300000	6850000	3830000	5190000	3320000	1530000	5180000	8400000	4160000	9490000	6220000	3170000	4900000	6750000	5630000	7690000	5910000	4270000	4120000
Serum amyloid A-2 protein	0	0	0	773000	494000	0	0	0	2960000	0	0	3250000	0	21800	0	5640000	232000	0	1230000	0	0	6490000	1810000	220000	0	6830000	0	8180000	13100	25100000	0	0	5870000	2890000	0	3390000	0	38400	10900	444000	280000	175000	0	3350000	47200	776000
Hydrocephalus-inducing protein homolog	15100000	343000	6030000	1170000	4030000	2240000	171000	13100000	4040000	21300000	2950000	327000	1280000	2430000	729000	2960000	0	110000	10300000	2120000	1460000	2380000	324000	217000	24800000	265000	20200000	5450000	1280000	22600000	9150000	136000	5550000	631000	397000	3970000	657000	1030000	22400000	13300000	1560000	32500000	90300	775000	13500000	315000
SPARC-like protein 1	296000	175000	226000	111000	61600	162000	103000	172000	286000	152000	0	219000	0	170000	46800	43300	56600	149000	364000	0	172000	112000	26000	264000	224000	294000	18500	295000	136000	0	839000	143000	339000	247000	0	45900	0	118000	244000	80200	5860	186000	0	266000	346000	83900
Putative pregnancy-specific beta-1-glycoprotein 7	0	7740	0	0	0	923000	45400	3990000	2420000	2860000	13600	336000	0	0	0	0	0	0	0	1190000	0	0	0	0	0	0	0	2760000	1150000	62400	882000	0	959000	467000	0	0	1210000	0	0	0	804000	2700000	1080000	0	0	0
Pappalysin-2	0	0	0	0	0	0	0	0	270000	70300	0	0	0	0	0	0	0	0	300000	62100	16900	76000	0	0	0	0	425000	278000	0	34900	155000	0	136000	41300	0	35600	0	0	819000	55900	0	371000	0	85000	0	0
Platelet basic protein	428000	36800000	3300000	27500000	1120000	23700000	3140000	4060000	53800000	16300000	4850000	19100000	6870000	5570000	10700000	33500000	32300000	1020000	7180000	52400000	41100000	27100000	1140000	61000000	1380000	61400000	15200000	3990000	1080000	969000	11200000	218000	2880000	2840000	10600000	29400000	4120000	43800000	1060000	1350000	4260000	32700000	23700000	8520000	3660000	38500000
Immunoglobulin kappa variable 2D-29	181000	403000	222000	543000	577000	325000	227000	247000	0	0	378000	229000	119000	0	1080000	0	308000	186000	184000	535000	340000	572000	860000	179000	192000	459000	0	0	293000	0	287000	878000	0	413000	1590000	99100	1160000	1220000	44600	0	449000	0	0	28100	150000	400000
Immunoglobulin lambda variable 4-69	642000	1800000	2380000	3560000	2630000	1580000	1070000	1270000	3730000	1100000	3030000	770000	2270000	3970000	3090000	2240000	948000	1570000	2930000	2320000	2660000	4020000	3020000	1030000	2260000	3780000	636000	850000	999000	32700	1080000	2520000	3960000	5280000	1730000	2940000	2600000	2300000	1780000	1820000	1920000	412000	4860000	3520000	5490000	7220000
Hemopexin	1700000000	1190000000	1390000000	825000000	1960000000	1240000000	955000000	1630000000	1110000000	1520000000	999000000	1430000000	1360000000	1370000000	1310000000	1080000000	1170000000	1870000000	1450000000	853000000	1260000000	1140000000	1850000000	984000000	1740000000	1030000000	1090000000	907000000	1390000000	1140000000	1060000000	1150000000	1310000000	1380000000	1730000000	982000000	1010000000	838000000	1010000000	2030000000	1090000000	2010000000	1030000000	1430000000	1400000000	1120000000
Pregnancy-specific beta-1-glycoprotein 5	4640000	416000	7050000	19200000	245000	404000	2260000	4030000	993000	4080000	149000	22000000	22800000	4220000	812000	138000	67600	108000	4740000	99200	72300	8870000	195000	310000	3590000	60800	4170000	1740000	12500000	3840000	3920000	15000000	3120000	155000	230000	6600000	131000	61200	3670000	3300000	2270000	3810000	138000	6160000	6610000	398000
Immunoglobulin heavy variable 3-7	8260000	9220000	7650000	7440000	16200000	5460000	5980000	4170000	11200000	3110000	487000	2700000	7320000	6090000	10500000	9870000	7890000	20300000	10100000	898000	7820000	6730000	13200000	4320000	14900000	5850000	3110000	5750000	14400000	6380000	8330000	24000000	6920000	5220000	17300000	9790000	1570000	10700000	4900000	8410000	3510000	5420000	1250000	5570000	9130000	6740000
Immunoglobulin kappa variable 2-30	170000	305000	31200	227000	89400	78500	122000	128000	182000	132000	0	0	83300	0	0	161000	0	11900	284000	0	459000	56500	0	69600	177000	160000	107000	76200	0	313000	187000	186000	0	116000	0	13500	0	46400	41100	146000	0	0	0	0	0	0
Sex hormone-binding globulin	56800000	31600000	51400000	38400000	38200000	31600000	35500000	45600000	59200000	75700000	31900000	53300000	23700000	33700000	33300000	41000000	20200000	35100000	20200000	44000000	37400000	17300000	48200000	30500000	40700000	44200000	54700000	37600000	27600000	31400000	27600000	26000000	40100000	63200000	32100000	53100000	34500000	46000000	48400000	30300000	50900000	51300000	38600000	18900000	27400000	54100000
Immunoglobulin heavy variable 3-35 (non-functional) (Fragment)	95700	30700	32700	39600	828	41300	1990	0	0	5440	0	0	11700	63200	0	0	1970	0	7760	0	21300	54000	0	3460	0	6250	0	24200	0	15600	7340	38800	16800	19600	0	20500	0	17400	0	0	0	0	0	0	35800	4060
Angiotensinogen	603000000	267000000	633000000	357000000	395000000	518000000	484000000	678000000	478000000	417000000	440000000	407000000	367000000	611000000	313000000	372000000	372000000	523000000	537000000	474000000	432000000	253000000	421000000	326000000	419000000	352000000	564000000	627000000	524000000	334000000	390000000	237000000	419000000	586000000	366000000	287000000	286000000	341000000	394000000	758000000	390000000	730000000	381000000	582000000	575000000	326000000
Immunoglobulin lambda variable 1-47	18400000	30800000	22200000	38100000	26500000	23000000	24200000	26700000	43500000	23000000	65300000	12500000	38100000	28500000	53000000	23000000	17100000	3700000	32000000	30700000	43100000	31500000	22400000	10000000	49600000	23800000	23100000	12900000	21000000	16900000	27000000	25900000	18900000	15900000	49900000	14900000	23300000	24400000	16400000	23500000	35300000	25900000	25700000	31000000	28900000	16900000
Pregnancy-specific beta-1-glycoprotein 9	20100000	2540000	5660000	4340000	4150000	4490000	4770000	38400000	19500000	14200000	3170000	5530000	4030000	8580000	1280000	10100000	1650000	3900000	0	8500000	4660000	4650000	3230000	4760000	26000000	4860000	14000000	9280000	12700000	15200000	10000000	697000	1450000	22700000	6430000	4330000	1220000	3070000	51400000	4740000	4650000	14000000	1870000	21700000	34100000	738000
Complement component C6	68900000	46500000	69700000	52600000	56200000	58500000	34600000	76800000	59700000	70600000	29200000	52900000	39900000	59800000	51900000	51900000	45200000	36600000	80400000	10600000	60300000	39800000	31500000	46700000	77300000	69000000	134000000	66000000	36700000	70900000	84000000	21500000	65000000	55300000	20000000	53300000	20900000	47200000	87500000	82300000	41100000	83500000	28700000	73500000	95600000	51300000
Immunoglobulin kappa joining 4 (Fragment)	1450000	1100000	729000	879000	881000	2140000	607000	1100000	973000	817000	0	383000	1350000	597000	738000	788000	1180000	1400000	945000	522000	1340000	1910000	0	1080000	1690000	1140000	469000	468000	4450000	1090000	983000	2040000	1210000	1720000	5210	1370000	0	1190000	1590000	2230000	1630000	949000	488000	1410000	1300000	1090000
Fibrinogen gamma chain	2730000000	5790000000	2800000000	4060000000	3210000000	33300000	3710000000	4920000000	3330000000	3550000000	104000000	98200000	133000000	1770000000	4430000000	2050000000	5150000000	2490000000	4680000000	3730000000	5440000000	3330000000	2940000000	5240000000	2680000000	5180000000	15200000	2690000000	4870000000	5520000000	3340000000	3910000000	5190000000	4710000000	115000000	3990000000	96000000	161000000	4790000000	5330000000	3770000000	21700000	2650000000	4360000000	4800000000	5280000000
Hemoglobin subunit alpha	2310000000	1230000000	1760000000	561000000	366000000	162000000	820000000	1620000000	1420000000	3360000000	123000000	294000000	189000000	941000000	278000000	581000000	1080000000	189000000	1290000000	2070000000	742000000	1430000000	211000000	1610000000	646000000	1240000000	1160000000	447000000	357000000	2650000000	965000000	581000000	1930000000	1030000000	75500000	757000000	471000000	83700000	723000000	668000000	395000000	394000000	315000000	982000000	1120000000	936000000
B-cell differentiation antigen CD72	0	31600	0	221000	0	14100	55400	0	374000	0	0	146000	0	0	0	556000	762000	0	0	1170000	65000	72300	14400	0	0	1430000	0	0	0	0	92300	182000	47800	15600	995000	0	189000	94400	0	0	0	0	56900	0	0	117000
Palmitoleoyl-protein carboxylesterase NOTUM	0	16200	811000	1020000	1690000	959000	792000	2020000	811000	606000	632000	488000	729000	1480000	1210000	957000	602000	1750000	265000	277000	402000	829000	1030000	823000	629000	450000	758000	2140000	651000	2950000	1010000	7750000	663000	635000	532000	1610000	570000	1280000	642000	1300000	0	771000	1180000	2060000	1130000	25900
Beta-2-microglobulin	5340000	6660000	3480000	4570000	3320000	3120000	4110000	4280000	6930000	3500000	0	4270000	2550000	5440000	4420000	2170000	3400000	4780000	7390000	688000	6550000	2530000	258000	10300000	10500000	20600000	6020000	16600000	1950000	4810000	7860000	3140000	12700000	14100000	0	2940000	74300	5030000	11400000	10200000	578000	8220000	4520000	7260000	10900000	3860000
Immunoglobulin kappa joining 3 (Fragment)	1050000	2670000	1740000	1960000	2260000	2550000	2550000	708000	0	479000	4930000	1360000	3210000	0	2600000	1110000	0	3040000	1510000	1930000	3680000	1530000	3370000	1070000	2830000	2540000	572000	0	1780000	541000	0	1910000	289000	2090000	5200000	1330000	6590000	2420000	0	0	2330000	0	1790000	1210000	0	0
Fibrinogen beta chain	3340000000	4720000000	3430000000	3570000000	2490000000	64000000	3300000000	5570000000	2860000000	3730000000	56400000	31000000	73800000	2100000000	3380000000	2010000000	4210000000	2390000000	5270000000	4140000000	4730000000	2970000000	2900000000	4210000000	3090000000	4630000000	27200000	2900000000	4170000000	6140000000	3690000000	3520000000	6150000000	3570000000	80400000	3980000000	104000000	55200000	5740000000	5860000000	3560000000	32600000	3000000000	5040000000	5600000000	4330000000
Immunoglobulin kappa variable 3-20	144000000	114000000	134000000	131000000	109000000	169000000	85200000	101000000	109000000	95300000	179000000	80500000	137000000	96000000	123000000	96100000	69500000	110000000	75200000	104000000	164000000	103000000	180000000	114000000	201000000	101000000	104000000	52000000	105000000	114000000	141000000	199000000	64900000	89800000	88500000	89500000	133000000	116000000	97000000	93900000	139000000	136000000	121000000	111000000	120000000	85100000
Transforming growth factor-beta-induced protein ig-h3	1490000	1570000	3110000	1870000	2430000	2520000	2120000	1880000	2940000	3230000	2620000	1350000	2780000	3230000	2750000	2120000	1770000	2920000	3460000	955000	2650000	1040000	2530000	2290000	2970000	2190000	5630000	4450000	2050000	4210000	2670000	1010000	2950000	2510000	1890000	1930000	1430000	4240000	5600000	4320000	1420000	7800000	1980000	2180000	3150000	1650000
Immunoglobulin kappa variable 1-9	6430000	1940000	3260000	4140000	3010000	6080000	1660000	0	3390000	0	1440000	2970000	4430000	4400000	1040000	7940000	68400	3950000	4100000	3270000	2610000	0	672000	2290000	8670000	2410000	2930000	547000	2780000	5890000	451000	0	1840000	2160000	2480000	1900000	6780000	2330000	4350000	2800000	1530000	7580000	1710000	2020000	4930000	997000
Macrophage colony-stimulating factor 1 receptor	1940000	174000	963000	575000	227000	600000	198000	1960000	1710000	1860000	120000	644000	321000	508000	459000	532000	353000	184000	545000	640000	226000	145000	400000	112000	788000	756000	2960000	647000	286000	808000	1420000	0	327000	531000	126000	285000	699000	455000	1740000	925000	335000	1210000	506000	1020000	1460000	274000
Transthyretin	5010000	66800000	27200000	76700000	183000000	179000000	147000000	7230000	36400000	7190000	60600000	187000000	165000000	31300000	156000000	84900000	185000000	172000000	47500000	249000000	156000000	42900000	171000000	214000000	2840000	135000000	382000	24800000	102000000	0	63100000	30100000	26800000	152000000	115000000	103000000	142000000	141000000	7230000	25600000	276000000	8110000	147000000	69800000	4290000	158000000
Immunoglobulin lambda variable 2-18	48900	1360000	2900000	921000	970000	0	1070000	368000	0	188000	2380000	986000	475000	0	1720000	433000	0	137000	0	319000	0	114000	340000	659000	222000	1320000	416000	703000	0	0	0	1490000	473000	0	1590000	0	1920000	0	2570000	687000	0	726000	527000	0	919000	683000
Hemoglobin subunit alpha	225000	362000	443000	425000	205000	111000	1260000	1320000	2150000	738000	124000	143000	0	272000	282000	659000	890000	42300	891000	810000	618000	1180000	0	586000	173000	602000	387000	700000	371000	840000	415000	381000	486000	604000	196000	20200	515000	382000	143000	73100	531000	0	300000	146000	736000	684000
Serpin A11	635000	0	0	0	0	0	17900	286000	0	294000	0	0	0	112000	30400	13700	76200	70800	204000	0	0	41300	0	0	324000	0	546000	0	0	154000	0	0	0	28500	7770	0	7690	28200	496000	154000	47400	357000	68400	94000	365000	0
Immunoglobulin lambda variable 10-54	2330000	2470000	2270000	3770000	4030000	1860000	983000	83900	2610000	3270000	0	2860000	8490000	1730000	2110000	1650000	0	2390000	3330000	0	3200000	0	2520000	0	7740000	2540000	3010000	0	1350000	7040000	3010000	0	1290000	0	4090000	0	424000	591000	1870000	2190000	2610000	985000	0	0	203000	2270000
Apolipoprotein(a)	12900000	719000	7950000	1150000	49700000	9440000	4200000	27500000	18600000	11800000	2660000	10700000	3510000	722000	52100000	9800000	1650000	9600000	682000	1130000	120000000	8130000	3080000	2170000	668000	2120000	24300000	55500000	2100000	4690000	61900000	18500000	55200000	34100000	0	26000000	5480000	18100000	22900000	656000	2510000	41200000	2030000	7180000	5680000	10100000
Zinc finger CCCH domain-containing protein 3	531000	720000	502000	657000	3480000	1450000	2020000	1230000	1080000	1190000	1770	0	4200000	1640000	4510000	313000	2400000	1380000	2550000	0	1280000	3540000	1540000	1110000	2710000	338000	1210000	1140000	543000	1720000	492000	4690000	379000	375000	0	657000	48200	7330000	1430000	981000	350000	1060000	110000	553000	382000	253000
Pantetheinase	506000	270000	271000	344000	329000	425000	135000	485000	364000	230000	50300	268000	122000	523000	218000	441000	369000	643000	380000	0	450000	44100	0	137000	171000	1150000	647000	382000	272000	0	516000	187000	424000	537000	0	8720	0	147000	615000	728000	0	1160000	0	715000	445000	177000
Vitamin K-dependent protein C	3600000	3030000	4940000	2630000	3700000	4580000	3390000	3910000	1350000	3540000	2550000	2670000	3220000	3770000	3230000	1400000	3130000	4780000	2950000	3510000	4070000	2040000	4940000	4310000	2700000	3330000	2890000	3530000	3600000	990000	3940000	1990000	4340000	1820000	2940000	2170000	3770000	2460000	2670000	4610000	4580000	3440000	4290000	4140000	4620000	3420000
Immunoglobulin kappa variable 1-16	4240000	1060000	1220000	1480000	1040000	1160000	1290000	3010000	567000	1640000	7010000	2050000	1210000	2840000	1090000	1410000	338000	293000	1400000	236000	1370000	914000	197000	1110000	6820000	1520000	2210000	1290000	1500000	3280000	1590000	240000	1760000	1720000	1000000	2060000	1960000	3310000	1530000	2190000	1790000	2830000	590000	804000	4750000	1930000
Complement factor H-related protein 5	224000	426000	56800	21200	0	0	0	67400	0	29700	0	43800	629000	71300	0	0	66000	18800	115000	0	58700	0	1490	240000	23400	46300	12300	328000	0	0	172000	64200	191000	0	0	3260	0	306000	370000	23600	0	34900	0	328000	118000	671000
Alpha-2-HS-glycoprotein	1080000000	884000000	1890000000	1260000000	1420000000	1310000000	1380000000	1590000000	1440000000	1390000000	1310000000	1120000000	1470000000	1300000000	1660000000	681000000	888000000	2140000000	1300000000	1320000000	1120000000	999000000	1510000000	935000000	1420000000	1230000000	2250000000	1200000000	1420000000	1610000000	1400000000	1090000000	1190000000	1230000000	2140000000	1070000000	1650000000	1410000000	1180000000	1570000000	1540000000	1290000000	1600000000	1530000000	1280000000	814000000
Apolipoprotein A-IV	1420000000	696000000	1250000000	817000000	611000000	769000000	704000000	967000000	593000000	1010000000	857000000	384000000	541000000	1900000000	477000000	324000000	546000000	1250000000	1460000000	604000000	1040000000	1040000000	674000000	1060000000	1160000000	806000000	714000000	1730000000	694000000	494000000	1050000000	852000000	1300000000	1250000000	642000000	371000000	212000000	724000000	1310000000	1690000000	936000000	409000000	452000000	2400000000	1980000000	507000000
Alpha-1-antitrypsin	765000000	37400000	1540000000	507000000	0	97800	1030000	110000000	1600000	576000000	0	576000	73700	93500000	394000000	14000000	412000000	524000000	954000000	775000000	557000000	249000000	187000	33500000	810000000	1940000	816000	1370000000	0	0	23500000	20900000	1230000000	0	3340000	430000000	2340000	2950000	9660000	701000000	0	1610000	50400000	1840000000	650000	4450000
Protein S100-A9	3250000	2620000	4720000	2180000	873000	1000000	167000	19800000	8450000	26900000	1570000	3850000	2260000	1090000	364000	26900000	27500000	73000	1060000	2170000	627000	18300000	2850000	11500000	3950000	3190000	11800000	1940000	252000	81300000	3050000	283000	8450000	2030000	462000	16200000	8500000	1660000	2300000	1100000	223000	8450000	369000	541000	5640000	2950000
Apolipoprotein A-V	694000	183000	52000	164000	0	108000	101000	0	13800	178000	941000	1300000	837000	214000	484000	211000	26300	5050000	1640000	0	77600	264000	8020	161000	76200	73100	426000	626000	150000	551000	214000	140000	85600	577000	0	210000	46600	0	58100	364000	183000	1160000	508000	6490000	580000	61000
Immunoglobulin heavy variable 3-64	0	519000	426000	527000	0	293000	182000	291000	690000	736000	531000	173000	636000	195000	646000	710000	463000	182000	542000	231000	464000	659000	1410000	0	1010000	377000	46600	143000	189000	593000	148000	132000	0	645000	2160000	866000	258000	917000	328000	466000	681000	362000	393000	248000	438000	530000
Immunoglobulin kappa variable 6D-21	894000	1860000	335000	2110000	698000	1480000	1080000	295000	670000	252000	643000	0	2180000	330000	1180000	449000	297000	39700	178000	2210000	3030000	859000	1370000	756000	370000	175000	1000000	204000	351000	0	1960000	2810000	292000	1340000	1380000	1050000	910000	1380000	189000	327000	78200	208000	428000	746000	101000	4920000
Alpha-1-acid glycoprotein 2	213000000	425000000	417000000	184000000	343000000	246000000	237000000	282000000	270000000	83400000	350000000	264000000	289000000	177000000	398000000	259000000	279000000	273000000	344000000	300000000	228000000	264000000	454000000	322000000	228000000	336000000	91400000	350000000	339000000	138000000	389000000	207000000	359000000	171000000	324000000	220000000	318000000	127000000	257000000	322000000	339000000	479000000	183000000	423000000	366000000	217000000
Coagulation factor XI	383000	287000	463000	173000	474000	150000	570000	751000	0	820000	0	195000	158000	231000	202000	243000	0	93700	500000	273000	299000	296000	311000	416000	626000	82000	804000	429000	640000	684000	498000	101000	944000	133000	42500	38700	497000	0	521000	535000	19400	387000	0	337000	1140000	263000
Complement factor H-related protein 4	725000	929000	1290000	665000	1590000	29300	168000	3010000	720000	1240000	0	0	384000	0	127000	125000	613000	908000	366000	181000	179000	652000	394000	163000	370000	125000	1730000	15600	1400000	2220000	1650000	1440000	329000	668000	223000	756000	17700	390000	264000	3440000	0	2390000	1220000	1730000	2200000	0
Solute carrier family 12 member 7	1790000	2810000	2530000	2800000	9180000	3910000	11700000	1730000	2600000	1810000	20200000	4160000	16700000	2630000	12900000	3170000	15500000	20200000	2240000	23700000	3180000	11700000	15600000	4070000	2180000	4950000	2430000	1740000	20000000	1690000	2620000	15000000	2750000	3760000	15000000	3320000	32600000	22900000	1840000	2850000	4020000	3220000	18600000	3140000	2510000	4170000
Immunoglobulin lambda variable 1-51	4760000	3850000	3100000	1340000	1790000	2060000	3210000	130000	1570000	5030000	4360000	499000	4610000	958000	3720000	2660000	1660000	1560000	3480000	2930000	6010000	1770000	2810000	262000	10800000	1590000	1890000	1150000	3740000	187000	5330000	484000	1680000	350000	2770000	1320000	4630000	2900000	2290000	3890000	2920000	1750000	285000	7670000	3650000	1370000
Leucyl-cystinyl aminopeptidase	2530000	6330000	676000	6490000	18400000	3550000	3970000	1510000	9700000	3050000	13000000	3790000	1340000	1420000	1120000	5070000	6140000	5500000	1280000	3870000	1350000	7780000	9650000	2500000	1230000	6850000	4040000	1330000	29200000	1020000	14900000	14800000	360000	5560000	2250000	6620000	2850000	4430000	5810000	1720000	10800000	751000	7940000	1950000	2490000	8790000
Apolipoprotein A-II	4500000000	3190000000	4930000000	2840000000	3710000000	2910000000	3870000000	4220000000	2590000000	4380000000	1470000000	3140000000	4060000000	4850000000	4000000000	1980000000	3730000000	5190000000	5280000000	2590000000	4050000000	2790000000	1800000000	4710000000	4170000000	3700000000	3130000000	5920000000	3140000000	3580000000	7020000000	3000000000	4980000000	2430000000	2240000000	2650000000	2050000000	3890000000	5330000000	5370000000	2040000000	4260000000	1710000000	6040000000	6640000000	3460000000
Platelet glycoprotein V	0	0	0	0	290000	630000	373000	0	262000	0	0	270000	572000	0	27200	233000	141000	0	0	0	0	76600	0	0	0	0	0	0	0	0	0	0	0	0	495000	248000	31900	285000	775000	0	313000	443000	0	0	0	0
Immunoglobulin kappa constant	2360000000	1460000000	2050000000	1550000000	1110000000	1750000000	1240000000	2060000000	1150000000	2150000000	2070000000	739000000	1780000000	2040000000	1660000000	1180000000	1020000000	836000000	1730000000	1740000000	1610000000	906000000	2520000000	795000000	3190000000	1250000000	1830000000	1150000000	1240000000	2140000000	2250000000	1350000000	1570000000	1170000000	1250000000	1040000000	1020000000	1550000000	2030000000	2580000000	913000000	2240000000	1730000000	2150000000	2300000000	938000000
Cytoplasmic dynein 1 heavy chain 1	571000	1360000	10800	813000	4490000	0	1490000	2060000	2580000	1890000	1200000	0	1580000	2460000	4120000	858000	2100000	2560000	1880000	0	116000	3140000	3360000	1980000	1820000	0	1260000	4280000	811000	0	2300000	1260000	1190000	458000	1930000	36700	2170000	2380000	0	883000	2510000	0	2290000	1050000	0	0
Haptoglobin-related protein	18600000	34000000	21700000	3810000	15100000	12600000	9740000	7750000	22400000	10400000	5260000	15000000	12000000	19500000	15900000	13800000	24400000	2830000	3380000	17900000	17500000	15000000	24400000	7630000	10500000	10600000	7830000	10400000	6440000	3660000	15800000	10100000	30400000	12800000	31400000	14400000	5240000	20500000	5250000	27600000	25300000	27200000	18800000	18200000	10800000	26300000
Polypeptide N-acetylgalactosaminyltransferase 5	205000	0	55500	0	453000	0	245000	390000	455000	325000	0	0	0	121000	412000	79500	643000	0	660000	411000	0	781000	291000	0	182000	0	0	225000	327000	545000	262000	756000	522000	37900	0	124000	0	0	589000	78800	529000	0	0	175000	128000	21800
Carbonic anhydrase 1	9850000	10700000	12500000	2770000	1680000	475000	5620000	7670000	6810000	11600000	0	1260000	342000	5180000	2300000	3760000	7590000	290000	10300000	16100000	3650000	5500000	1520000	19900000	2020000	4890000	2530000	2390000	3090000	4720000	2660000	1510000	13900000	6940000	0	3700000	4200000	0	1890000	2790000	1650000	1280000	1110000	6560000	3340000	6470000
Pregnancy-specific beta-1-glycoprotein 2	8260000	519000	6030000	2320000	1500000	1650000	4540000	9570000	4300000	3480000	62500	1650000	1980000	1500000	2260000	1680000	542000	10500000	2950000	96500	2620000	918000	1570000	1850000	3500000	3180000	6370000	2650000	2420000	3450000	1890000	1540000	2000000	6360000	2450000	1880000	555000	1450000	3440000	3830000	616000	5860000	948000	14100000	4670000	750000
Low affinity immunoglobulin gamma Fc region receptor III-B	140000	52700	363000	163000	37700	0	0	1590000	0	55300	0	179000	0	89400	0	0	0	41400	162000	0	0	48800	0	0	783000	0	77800	0	0	121000	0	0	169000	170000	0	0	30500	0	101000	96400	254000	0	0	0	0	0
Sickle tail protein homolog	1930000	1060000	0	2610000	71700	0	1840000	2340000	3830000	9730000	0	0	55000	0	26200	169000	0	293000	193000	0	1120000	0	0	843000	1990000	12900	0	480000	641000	6340000	352000	0	0	1170000	0	2630000	0	0	3190000	51300	0	0	3160000	325000	0	415000
